1 **Functional connectivity in northern swamp deer (*Rucervus duvaucelii duvaucelii*)**  
2 **population across a fragmented, human-dominated landscape along Gangetic Plains of**  
3 **north India: Implications for conservation in non-protected areas**

4

5 Shrutarshi Paul<sup>1\*</sup>, Sohini Saha<sup>1</sup>, Parag Nigam<sup>1</sup>, Garima Pandey<sup>1</sup>, Bilal Habib<sup>1</sup>, Dhananjai  
6 Mohan<sup>1</sup>, Bivash Pandav<sup>1</sup> and Samrat Mondol<sup>1\*</sup>

7 <sup>1</sup> Wildlife Institute of India, Dehradun, Uttarakhand

8

9 \*Corresponding authors:

10 Samrat Mondol, Animal Ecology and Conservation Biology Department, Wildlife Institute of  
11 India, Chandrabani, Dehradun, Uttarakhand 248001, [samrat@wii.gov.in](mailto:samrat@wii.gov.in)

12 Shrutarshi Paul, Animal Ecology and Conservation Biology Department, Wildlife Institute of  
13 India, Chandrabani, Dehradun, Uttarakhand 248001, [shrutarshipaul07@gmail.com](mailto:shrutarshipaul07@gmail.com)

14

15 Samrat Mondol: <https://orcid.org/0000-0003-3034-9396>

16 Shrutarshi Paul: <https://orcid.org/0000-0002-3950-7525>

17

18

19

20

21

22

23

24

25

## 26 **Acknowledgement**

27 We acknowledge the Forest Departments of Uttarakhand, Uttar Pradesh and Ministry of  
28 Environment, Forest and Climate Change (No. 244/2018/RE), Government of India for  
29 providing necessary permits and support to carry out our field work. Our thanks to the Forest  
30 Department officials especially Divisional Forest Officer, Haridwar Forest Division and local  
31 community members for assisting in sample collection. We acknowledge help from Vinod  
32 Thakur, Tista Ghosh, Suvankar Biswas, Dr. Sarbesh Rai, Shiv Kumari Patel, Shrushti Modi,  
33 Kaushal Singh Sissodia, Sultan Singh Badana, Nimisha Srivastava, Rakesh Mondol, Debanjan  
34 Sarkar, Prajak Kumar Das, Chitrapal, Imam, Ranju, Bhura, Annu, Juri, Inam, Ammi, M.Sc.  
35 students of Wildlife Institute of India (XVI batch) and villagers of Gendikhata and Tantwala  
36 for their help during the collaring operation and field surveys. We acknowledge Prof Paulo  
37 Alves and Dr Joao Queiros from University of Porto, Portugal for providing the STR markers.  
38 We appreciate technical help in laboratory from Tista Ghosh, Mouli Bose, Aamer Sohel Khan  
39 and A. Madhanraj. We thank the Director, Dean, Research Coordinator and Nodal Officer of  
40 Wildlife Forensics and Conservation Genetics cell of Wildlife Institute of India for their  
41 support. The work was funded by Uttarakhand Forest Department, Uttar Pradesh Forest  
42 Department, Ministry of Environment, Forest and Climate Change, Government of India and  
43 Conservation Force. Shrutarshi Paul was awarded Department of Science and Technology  
44 INSPIRE Research Fellowship (IF150680) and Samrat Mondol was supported by Department  
45 of Science and Technology INSPIRE Faculty Award (IFA12-LSBM-47).

46

47

48

49

50

51 **Abstract**

52 The Indian subcontinent has witnessed disproportionate declines in large mammalian herbivore  
53 communities. The northern swamp deer (*Rucervus duvaucelii duvaucelii*) exemplifies the  
54 conservation challenges of typical non-protected area species, where apart from distribution  
55 status other ecological information is limited for the upper Gangetic basin population. We  
56 combined elements of radio-telemetry and conservation genetics to evaluate dispersal patterns,  
57 population connectivity and assess genetic variation and inbreeding status of this population  
58 living across a highly human-dominated area. We genetically identified 266 unique swamp  
59 deer and further analyses revealed presence of two spatially-admixed genetic lineages with  
60 moderate heterozygosity ( $H_o=0.51$ ,  $SD= 0.10$ ) and low inbreeding ( $F_{IS}=0.133$ ) status. Multi-  
61 disciplinary evidence suggests that the small, isolated grassland patches between Jhilmil Jheel  
62 Conservation Reserve (JJCR) and Hastinapur Wildlife Sanctuary (HWLS) are highly preferred  
63 by swamp deer during migrations and are genetically connected. The southern part of the area  
64 in HWLS showed early signatures of genetic discontinuity that require immediate conservation  
65 attention. We hypothesized that the human settlement history of this landscape, river dynamics  
66 and species' ability to negotiate various pressures and disperse has helped to maintain such  
67 connectivity. While these signatures are encouraging for this small, isolated cervid population,  
68 careful management interventions are required to ensure the integrity and functionality of this  
69 landscape. We recommend a scientifically robust population estimation approach across this  
70 landscape and a multi-stakeholder-driven strategies to augment population and habitat  
71 recovery, plantation and riverscape management to ensure long-term survival of this species.

72

73 **Keywords:**

74 Grassland conservation, Herbivore population dynamics, Migratory movement patterns,  
75 Genetic health, Cervid behaviour, Phylogeography and population estimation

## 76 **1. Introduction**

77 The wild large mammalian communities have experienced severe population declines during  
78 last century (Ceballos et al. 2010; Ripple et al. 2015). Largely driven by various anthropogenic  
79 factors including overexploitation of natural resources, habitat loss and hunting (Isaac et al.  
80 2007; Morrison et al. 2007), large proportions (~50%) show reduced population size whereas  
81 ~25% are threatened with extinction (Schipper et al. 2008; Karanth et al. 2010). The  
82 conservation challenges are further exacerbated due to complex and inherent life-history  
83 strategies, habitat-specificity, endemism and outside protected area distributions in many  
84 species (Harihar 2011; Ripple et al. 2016; Punjabi and Rao 2017; Dorji et al. 2019). In  
85 particular, survival of the species residing within human-dominated landscapes will depend on  
86 critical assessment of important factors that govern their ecology, demography and other  
87 biological parameters across their distributions. The Indian subcontinent, being considered as  
88 mega-biodiversity hotspot retains a large number of such conservation-concerned species.  
89 Particularly the large herbivore assemblages are facing strong impacts of anthropogenic  
90 pressures where ~80% of the species are classified as ‘Threatened’ by IUCN (Ripple et al.  
91 2015). The habitat-specialist herbivores (for example, rhinoceros, wild buffalo, swamp deer,  
92 brow-antlered deer etc.) were designated as the most affected (Karanth et al. 2010) with  
93 recommendations for generating detailed information for their long-term conservation.  
94 The obligate, grassland-dwelling swamp deer (*Rucervus duvaucelii*) is currently considered  
95 one of the most extinction-prone megaherbivore in the Indian subcontinent (Karanth et al.  
96 2010). Once distributed across the riverine floodplains between Pakistan and Bangladesh  
97 through India, it is now restricted to isolated pockets in some parts of north, north-east and  
98 central India and south-west Nepal (Schaller 1967; Groves 1982; Sankaran 1989; Qureshi et  
99 al. 2004). Out of the three known subspecies (Pocock 1943; Ellerman and Morridon-Scott  
100 1951; Groves 1982; Qureshi et al. 2004), the northern counterpart (*Rucervus duvaucelii*

101 *duvaucelii*) makes up ~80% the global species population, distributed across two different areas  
102 in India namely the Sharda and Ganges habitat blocks spread through the northern states of  
103 Uttarakhand and Uttar Pradesh (Paul et al. 2020). The Sharda habitat block is part of the Terai  
104 Arc landscape whereas the Ganges habitat block represents the western-most distribution of  
105 the species (Qureshi et al. 2004; Paul et al. 2020). The swamp deer populations of the Sharda  
106 habitat block are relatively well studied and received adequate conservation attention as  
107 majority of them are found within protected areas (Qureshi et al. 2004; Ahmed and Khan 2008).  
108 On the other hand, the information on swamp deer from the Ganges habitat block has been  
109 insufficient till very recent time. Information on certain aspects of swamp deer ecology (group  
110 composition, feeding habits, activity budget- Tewari and Rawat 2013a, b, c, d, e; habitat  
111 assessment- Khan et al. 2003) was available from protected areas of the Gangetic habitat block.  
112 Recently, Paul et al. (2018, 2020) mapped the grassland habitats, documented detailed  
113 distribution and reported potentially small, inbred and scattered populations of the northern  
114 swamp deer across multiple fragmented grasslands covering both protected and non-protected  
115 areas in the upper part of the Gangetic habitat block. While this information has been critical  
116 in designating 'Priority Conservation Areas' in this habitat block (Paul et al. 2020), appropriate  
117 conservation planning would require further detailed assessments of migration routes,  
118 inbreeding status and genetic variation of this population. This is important as the Gangetic  
119 block swamp deer exhibit seasonal migratory behaviour (Paul et al. 2021) and no information  
120 on the genetic status and connectivity is available for this landscape so far.

121 In this paper, we investigate movement patterns and genetic status of the upper Gangetic  
122 population of the northern swamp deer. More specifically, our objectives were (1) to assess the  
123 genetic variation and inbreeding status of Gangetic swamp deer population and (2) evaluate  
124 their movement patterns and population connectivity using different approaches. We used a  
125 multidisciplinary approach through ecological surveys, radio-telemetry and genetic tools to

126 address these questions. Our findings have critical conservation implications for this species  
127 and the grassland habitats within this human-dominated landscape.

## 128 **2. Materials and Methods:**

### 129 **2.1 Research permissions**

130 All required permissions for fieldwork and sampling were accorded by the Forest Departments  
131 of Uttarakhand (Permit Nos: 1575/C-32 and 978/6-32/56) and Uttar Pradesh (Permit Nos.:  
132 2233/23-2-12 and 3438/23-2-12). The radio-collaring permission was approved by the  
133 Ministry of Environment, Forest and Climate Change (MoEF&CC), Government of India and  
134 Uttarakhand Forest Department (Permit No: 1-76/2017WL). Ethical approvals were provided  
135 by the Uttarakhand Forest Department.

### 136 **2.2 Study Area**

137 This study was conducted in the upper Gangetic habitat block between Jhilmil Jheel  
138 Conservation Reserve (JJCR), Haridwar (in Uttarakhand) and southern boundary of Hastinapur  
139 Wildlife Sanctuary (HWLS), Uttar Pradesh (Fig. 1a). The area covers ~120 km stretch of the  
140 Ganges river along with its tributaries Banganga and Solani. A maximum width of 8 km from  
141 both banks of all these rivers was considered as the survey regions as all swamp deer habitats  
142 were earlier reported within 5-6 km of the river banks (Paul et al. 2018, 2020). In total, the  
143 study area comprised ~ 3173 km<sup>2</sup> of habitat covering both protected (HWLS and JJCR- 1677  
144 km<sup>2</sup> area) as well as non-protected (1496 km<sup>2</sup> area) regions. This landscape is one of the most  
145 densely populated areas of the entire country (population density of 1164 people/ km<sup>2</sup>  
146 compared to national average of 382 people/ km<sup>2</sup> (Census of India 2011)) with a mosaic of land  
147 use patterns including agricultural fields (76%), waterbodies (7%), forest (6%), grassland (6%),  
148 settlement (4%) and scrubland (1%) ( Paul et al. 2021). Despite such high human footprint,  
149 these habitats retain rich faunal biodiversity including swamp deer (*Rucervus duvaucelii*  
150 *duvaucelii*), hog deer (*Axis porcinus*), nilgai (*Boselaphus tragocamelus*), fishing cat

151 (*Prionailurus viverrinus*), Wild boar (*Sus scrofa*) and birds such as sarus crane (*Grus antigone*),  
152 black-necked stork (*Ephippiorhynchus asiaticus*), lesser adjutant (*Leptoptilos javanicus*),  
153 Pallas's fish eagle (*Haliaeetus leucoryphus*) and bar-headed goose (*Anser indicus*) (Bashir et  
154 al. 2012; Grimmett et al. 2013).

### 155 **2.3 Biological sampling, DNA extraction and species identification**

156 We used earlier field-collected ungulate samples that were obtained as part of swamp deer  
157 surveys between JJCR and southern boundary of HWLS (Paul et al. 2018, 2020) in northern  
158 India. A total of 258 antlers and 2499 pellet samples were available to estimate genetic diversity  
159 of this population. We selected a total of 488 samples (258 antlers and 230 fresh pellets) for  
160 genetic analyses as they provided homogenous spatial representation of the study area ((Fig.  
161 1b; Supplementary Table S1). We decided to use all the antler samples as they are known to  
162 provide good quality DNA for genetic analyses (Gupta et al. 2013; Venegas et al. 2020).

163 In the laboratory, we performed DNA extraction from the antler and pellet samples using  
164 already-established protocols (Paul et al. 2019). In brief, we cut each antler using individual  
165 sterile saw blades from the base and collected the powders in separate tubes. About 20 mg of  
166 the powder was weighed, decalcified (in 0.5M EDTA (pH 8) for 48 hours) followed by lysis  
167 (with 40µl Proteinase K and 400µl of ATL solution at 56°C for seven days). For pellets, we  
168 swabbed the top layer of each sample using sterile swabs (Biswas et al. 2019). In both cases,  
169 DNA extraction was done using spin-column protocol of the QIAamp DNA Tissue Kit (Qiagen  
170 Inc, Hilden, Germany) and DNA was eluted twice in 100µl preheated 1X TE buffer. Negative  
171 controls were kept to monitor any possible contamination. To reduce the contamination  
172 chances from poor-quality samples, all pellet extractions were performed in a physically  
173 separate laboratory space dedicated for non-invasive samples ensuring geographic separation  
174 between pre and post-PCR workspace. Antler DNA was extracted in a separate DNA extraction  
175 facility at the institute. In addition, standard procedures including regular sterilization (through

176 UV and bleach) of the laboratory between processing of different batches of samples, inclusion  
177 of extraction and PCR negatives etc. were maintained.

178 The antler samples did not require any molecular species identification due to their distinctive  
179 morphological features (six-tined patterns) (Qureshi et al. 2004). However, we used swamp  
180 deer-specific molecular assays for pellet DNA (Paul et al. 2019) to remove other co-existing  
181 ungulates from further genetic analyses. The PCR reactions (10 $\mu$ l volume) contained 4 $\mu$ l  
182 multiplex buffer (QIAGEN Inc.), 4 $\mu$ g of BSA (4mg/ml), 0.25  $\mu$ M of primer mix and 2 $\mu$ l each  
183 of 1:10 diluted DNA extracts and DNase-RNase free water with following conditions: initial  
184 denaturation (95°C for 15 min); 45 cycles of denaturation (95°C for 30 sec), annealing (50°C  
185 for 40 sec) and extension (72°C for 40 sec), followed by a final extension (72°C for 10 min).  
186 Negative controls were included to monitor contamination. The amplified products were  
187 checked in 2% agarose gel for species-specific band patterns (Paul et al. 2019). Samples not  
188 confirmed with swamp deer-specific markers were subjected to an ungulate-specific molecular  
189 assay (Gupta et al. 2014). Amplified products were cleaned with Exonuclease (Thermo  
190 Scientific, Waltham, USA) and Shrimp Alkaline Phosphatase (Amresco, Solon, USA) mixture  
191 and sequenced bidirectionally in an ABI 3500XL bioanalyzer (Applied Biosystems). The  
192 sequences were aligned, manually screened for any ambiguities and matched against the  
193 Genbank database.

#### 194 **2.4 Individual identification and molecular sexing**

195 The swamp deer population along the upper Gangetic plains is known to be small, fragmented  
196 and potentially inbred (Paul et al. 2020), and thus it was important to develop a marker panel  
197 for individual identification with high statistical support. We selected a set of 48 microsatellite  
198 markers (developed for red deer, Coulson et al. 1998) based on available information on  
199 polymorphism, amplicon size and success in cross-species amplification. We adopted a cost-  
200 effective universal M13 primer-based approach (Schuelke 2000; Csencsics et al. 2010)) to



201 screen these markers with a set of reference swamp deer samples (24 antlers and 18 genetically  
202 identified pellets). The shortlisting criteria included (i) amplification success, (ii) amplicon  
203 size, (iii) polymorphism, (iv) ease in allele calling and (v) stable allele characteristics (Hoffman  
204 and Amos 2005; Pompanon et al. 2005; Linacre et al. 2011; Johnson et al. 2014; Ghosh et al.  
205 2021). PCR reactions were performed in 10 $\mu$ l volumes containing 4 $\mu$ l Qiagen multiplex PCR  
206 master mix (QIAGEN Inc.), 0.2 $\mu$ M forward primer, 0.1 $\mu$ M reverse primer, 0.2 $\mu$ M labelled  
207 M13 primer, BSA (4mg/ml) and 2 $\mu$ l of the DNA extract (1:10 diluted) with negative controls.  
208 PCR reactions included an initial denaturation at 95°C for 15 min; 45 cycles of denaturation at  
209 95°C for 30 sec, annealing at 57°C for 40 sec, extension at 72°C for 40 sec; final extension at  
210 72°C for 20 min. PCR products were genotyped (with HIDi formamide and Liz 500 size  
211 standard) in an automated sequencer ABI 3500XL (Applied Biosystems). To ensure good data  
212 quality each marker was amplified three independent times. Alleles were scored using program  
213 GENEMARKER (Soft genetics Inc., Pennsylvania, United States) and data quality was  
214 maintained by using ‘quality index’ approach (Miquel et al. 2006; Modi et al. 2018), where a  
215 quality score of 0.66 or above was approved. The final set of markers was individually labeled,  
216 standardised as multiplex reactions and compared (with the M13 data) for data consistency.  
217 We used molecular sexing assay (Paul et al. 2019) to ascertain sex of the individually identified  
218 pellet samples. The PCR reactions contained 4 $\mu$ l multiplex buffer (QIAGEN Inc.), 4 $\mu$ g of BSA  
219 (4mg/ml), 0.25  $\mu$ M of primer mix, 2 $\mu$ l each of 1:10 diluted DNA extracts and DNase-RNase  
220 free water. PCR conditions included an initial denaturation (95°C for 15 min); 45 cycles of  
221 denaturation (95°C for 30 sec), annealing (57°C for 40 sec) and extension (72°C for 40 sec),  
222 followed by a final extension (72°C for 10 min). Negative controls were included to monitor  
223 contamination. The amplified products were checked in 3% agarose gel for sex-specific band  
224 patterns (Paul et al. 2019).

## 225 **2.5 Data analysis**

226 2.5.1 Genetic variation

227 We ascertained genetic recaptures by comparing all the genotype data in program CERVUS  
228 (Kalinowski et al. 2007). After removing the recaptures, we used program GIMLET (Valière  
229 2002) to identify the low-frequency alleles (less than 10% in the entire data set) for  
230 confirmation and calculated  $P_{ID(sibs)}$  for the dataset. For the final microsatellite panel, we  
231 calculated locus-wise and overall summary statistics (GIMLET (Valière 2002) and genotyping  
232 error rates (MICROCHECKER v 2.2.369 (Van Oosterhout et al. 2004), FreeNA (Dempster et  
233 al. 1977; Chapuis and Estoup 2007) and data-based calculations (Broquet and Petit 2004)).  
234 Program ARLEQUIN (Excoffier et al. 2005) was used to determine Hardy-Weinberg  
235 equilibrium and linkage disequilibrium.

236 2.5.2 Population structure detection

237 We used both Bayesian (STRUCTURE and GENELAND) as well as non-Bayesian (DAPC)  
238 approaches to infer patterns of swamp deer genetic structure within the study area. In  
239 STRUCTURE analyses, we performed 10 independent runs for each cluster value (K) between  
240 1 and 10 with both non-spatial and locprior models, along with correlated allele frequency  
241 model. A total of 450,000 iterations and 50,000 burn-in were performed. For the locprior  
242 model-based analyses, we stratified the 120 km stretch of Ganges river in the study area into  
243 five continuous blocks (each block length ~24 km) based on earlier recorded swamp deer  
244 movement patterns in this landscape (Paul et al. 2021). The optimal value of K was assessed  
245 using the “Evanno” method in STRUCTURE HARVESTER web version (Earl and vonHoldt  
246 2012). The individuals were sorted as “pure” or “admixed” based on 70% ancestry coefficient  
247 threshold values (Ashrafzadeh et al. 2021). We also used another Bayesian clustering approach  
248 implemented in program GENELAND version 4.0.3 (Guillot et al. 2005) to assess spatial  
249 patterns of genetic structure without assuming admixture (Guillot et al. 2005; De et al. 2021).  
250 We used the spatial model assuming 10 clusters (with no uncertainty on coordinates),

251 correlated allele frequencies and ran the analyses with 100000 iterations of which every 100<sup>th</sup>  
252 observation was retained. Additionally, to test the extent of genetic structuring in this  
253 landscape, we used a non-Bayesian programme, Discriminant Analysis of Principal  
254 Components (DAPC) using R-package ‘adegenet’ (Jombart et al. 2010) in R studio 1.1.463.  
255 This approach transforms the genetic data into principal components, followed by clustering to  
256 define group of individuals with a consideration of minimum within-group variation and  
257 maximum between-group variations among the clusters. We used the apriori population cluster  
258 assignment approach (five locations as used in Structure locprior model) where we selected the  
259 number of Principal Components based on optimisation of ‘ $\alpha$ ’ score through spline  
260 interpolation (De et al. 2021). We calculated genetic differentiation (pairwise  $F_{ST}$ ) in  
261 ARLEQUIN version 3.1 (Excoffier et al. 2005) between the genetic groups used in Structure  
262 analysis (Estes-Zumpf et al. 2010; He et al. 2010; Zachos et al. 2016).

### 263 2.5.3 Inbreeding and relatedness analysis

264 We used individual-level genetic data to assess the degree of inbreeding in this population. We  
265 calculated inbreeding coefficient ( $F_{IS}$ ) using program FSTAT (version 2.9.3.2; (Goudet 2002),  
266 where p value was computed through 13000 randomisations (Gibbs et al. 1997; Heuertz et al.  
267 2004; Hernández et al. 2020). Further, we used program ML-RELATE (Kalinowski et al. 2006)  
268 to calculate maximum likelihood estimates of pair-wise relatedness and relationship categories  
269 between individuals. We selected highly related individuals (relatedness value of  $>0.6$ ) with  
270 100% amplification at all loci and plotted their geographical distribution in this landscape to  
271 establish genetic signatures of movements (Rodzen et al. 2004; Puill-Stephan et al. 2009;  
272 D’Aloia et al. 2018).

### 273 2.6 Capture, collaring and telemetry analysis

274 We undertook radio-collaring study to understand movement patterns of swamp deer in this  
275 landscape. We collared two apparently healthy female swamp deer using drive net approach in

276 JJCR, Uttarakhand during May-June 2018 (Kock et al. 1987; López-Olvera et al. 2009). The  
277 animals were acclimatised (for three months) to the conditions before collaring operations.  
278 Once captured in the net, the animals were blindfolded and administered with a mild dose of  
279 sedative Azaperone (40mg/ml dose) and fitted with GPS Vertex Plus satellite collars  
280 (Vectronic Aerospace). The collars were set to provide information on latitude, longitude, time  
281 and temperature at every 2-hour interval. The two collared animals were monitored for 14  
282 months (Female 1) and 11 months (Female 2), respectively to understand their movement  
283 routes and identify the critical stopover sites (based on 10% of total locations in any site,  
284 (Sawyer and Kauffman 2011). We analysed various movement parameters (total distance  
285 travelled, longest distance from starting point, mean step length, mean speed etc.) in ArcGIS  
286 10.2.2. using the ArcMET (version 3) (Wall et al. 2013; Wall 2014). We performed Net squared  
287 displacement (NSD) analysis to categorise the movement patterns into different classes  
288 (migratory, mixed migratory, nomadic, dispersal and home range) for each individual  
289 (Bunnefeld et al. 2011).

### 290 **3. Results:**

291 Out of 230 field-collected faecal pellets, 159 were confirmed as swamp deer, making the total  
292 sample size as 417 (258 antlers and 159 pellet samples) for downstream analysis. The  
293 remaining samples either belonged to other herbivores (n=44, nilgai-22; hog deer-16; barking  
294 deer-3 and domestic goat-3) or did not produce any results (n=27, possibly due to poor DNA  
295 quality).

#### 296 **3.1 Microsatellite markers and swamp deer genetic diversity**

297 During initial standardization, 27 of the initially selected 48 markers were rejected due to  
298 various reasons (no amplification- two loci, inconsistent amplification- five loci, multiple  
299 bands- 16 loci, non-specific bands- four loci). Further scrutiny of the remaining markers (n=21)  
300 revealed that two loci showed excessive stutter bands and low RFUs, three loci did not produce

301 stable allele characteristics and three markers showed inconsistent results with antler and pellet  
302 DNA, resulting in a final microsatellite panel consisting 13 loci (Supplementary Table S2).  
303 During individual identification, samples with at least 10 loci data were considered based on a  
304 statistically strong  $P_{ID(sibs)}$  value of  $1 \times 10^{-4}$  (given that the global population of swamp deer is  
305  $\sim 5000$  individuals, (Duckworth et al. 2015).

306 We generated 10 or more loci data from 298 samples (190 antlers and 108 pellet samples),  
307 which resulted in identifying 266 unique swamp deer individuals (from 168 antlers and 98  
308 faecal pellets). Remaining 32 genotypes were identified as genetic recaptures (ranging from 1-  
309 3 recaptures of already identified individuals). The standardized STR panel showed a mean  
310 91.19% success rate (84.93-95.14% range) and low genotyping errors (mean frequency of null  
311 alleles, false alleles and mean allelic dropout rate was 0.06 (range 0-0.17), 0.09 (range 0.05-  
312 0.15) and 0.09 (range 0.04-0.18), respectively). Overall, the panel was found to be moderately  
313 polymorphic with a mean of 6 alleles (SD 3.48, varying between 2-13 alleles) and expected  
314 and observed heterozygosity of 0.60 (SD 0.15) and 0.51 (SD 0.10), respectively. None of the  
315 loci deviated from Hardy-Weinberg equilibrium and we found no strong linkage  
316 disequilibrium. Loci-wise summary statistics are shown in Table 1. Molecular sexing of the  
317 faecal pellets (n=98) ascertained 47 female and 51 male samples (219 males and 47 females in  
318 total).

### 319 **3.2 Population Structure**

320 The STRUCTURE results (with locprior model) show three genetic lineages (based on ancestry  
321 admixture coefficient threshold of 70%) in the swamp deer population (K=3). These three  
322 genetic lineages can be divided into the following groups: Group I- 44 individuals, Group II-  
323 126 individuals and Group III- 16 individuals, respectively. In addition, remaining 80  
324 individuals showed signatures of mixed genetic lineages (mostly between Groups I and II) (Fig.  
325 2a). The non-spatial model indicated K=2, where 87, 81 and 98 individuals were assigned to

326 Group I, Group II and Group III (admixed), respectively. The DAPC analysis (with five apriori  
327 groups) showed the first four groups were overlapping whereas the fifth group formed a distinct  
328 entity. When examined closely, we found that individuals forming Group I, II and the mixed  
329 group (from STRUCTURE locprior analysis) and first four groups (from DAPC analysis) were  
330 found throughout the landscape. The Group III from STRUCTURE locprior and the fifth  
331 DAPC group was mostly restricted to southern part of HWLS below Bijnor Barrage (Blocks 4  
332 and 5) (Figs. 2b, 2c). Taken together, we interpret that the swamp deer population between  
333 JJCR and HWLS is genetically connected. The genetic differentiation among these five groups  
334 ranged between 0.005-0.09 (Table 2). However, the results of the GENELAND analyses  
335 suggests two genetic clusters (mode of posterior distribution at  $K=2$ ) across the study  
336 landscape: the first cluster corresponding with the STRUCTURE locprior results (Group I, II  
337 and the mixed lineages formed a single group) and the second cluster corroborated with the  
338 separate group (Group III in case of STRUCTURE locprior and fifth group as per the DAPC  
339 analysis) (Fig. 2d).

### 340 **3.3 Inbreeding status**

341 Based on the genetic data from the swamp deer individuals sampled in the upper Gangetic  
342 habitat ( $n=266$ ), we found the inbreeding co-efficient (mean  $F_{IS}$  value) to be 0.128 ( $p<0.05$ ),  
343 indicating low levels of inbreeding. Overall, the males ( $n=219$ ) show slightly higher  $F_{IS}$  value  
344 of 0.175 ( $p<0.05$ ) than the females ( $n=47$ ,  $F_{IS}= 0.133$  ( $p<0.05$ )). Pair-wise average relatedness  
345 ranged between 0.0001-0.93 across the dataset. When the locations of all the highly-related  
346 individual pairs (relatedness $>0.6$ ,  $n=39$  pairs) were plotted, eight pairs were found to be spread  
347 across the study landscape, supporting recent movement of individuals in this landscape  
348 (Supplementary Fig. S1).

### 349 **3.4 Radio-collaring**

350 Path trajectory analyses for both females (Female 1-14 months and Female 2- 11 months)  
351 showed a downward linear distance movement of 18 and 28 km for them, respectively. The  
352 maximum linear distance travelled, average step length, speed and other parameters for both  
353 the collared individuals are summarised in Table 3 (Figs. 3a, 3b). NSD analysis suggests that  
354 Female 1 exhibited mixed migratory (returning to a location situated midway between initial  
355 point and furthest point) whereas Female 2 showed migratory (returning back to its original  
356 location after 9 months) type movement patterns (Figs. 3c, 3d). Some of the important stopover  
357 points during swamp deer movement routes between JJCR and HWLS are grassland patches  
358 within Ranjeetpur and adjacent river island complex (Point c in Figs. 3a, 3b), Amichand-  
359 Nangal complex (Point d in Figs. 3a, 3b) and Sukhapur-Manwala-Chandpuri complex (Point e  
360 in Fig. 3b).

#### 361 **4. Discussion**

362 The densely-populated upper Gangetic plains of north India currently retain the westernmost  
363 distribution of swamp deer population that faces acute anthropogenic pressures in the form of  
364 habitat loss from rapid urbanisation, expanding human population and associated agricultural  
365 activities (Paul et al. 2020). As significant portion of these available habitats fall outside  
366 protected area jurisdictions, habitat conservation and population management is experiencing  
367 serious challenges. Further, scattered and inadequate information on their habitat use and  
368 movement patterns across the landscape make any conservation plan difficult. This study has  
369 generated probably the most exhaustive primary information on swamp deer dispersal patterns  
370 and genetic status in this landscape showcasing the importance of the remaining patchy  
371 grassland habitats for their future survival. Our assessments based on a combination of genetic  
372 and radio-telemetry approaches revealed that the entire fragmented landscape between JJCR  
373 and HWLS is functionally connected and the small, isolated patches of the grasslands are  
374 regularly used by swamp deer for their seasonal dispersals. These results substantiate the earlier

375 research focused on the importance of the remnant grassland habitats from this landscape  
376 (Khan and Khan 1999; Khan et al. 2003; Qureshi et al. 2004; Tewari and Rawat 2013b; Paul  
377 et al. 2018, 2020; Mondol et al. 2019). Such combined approaches have been adopted in other  
378 studies to derive conclusions about connection between geneflow and movement patterns  
379 (Riley et al. 2006; Boulet et al. 2007; Kaczensky et al. 2011; Gustafson et al. 2017; Carvalho  
380 et al. 2018). One of the most important outcome of this study is identification of 266 northern  
381 swamp deer individuals within the Gangetic habitat block region. This is probably the first  
382 report of confirmed minimum numbers of this subspecies from this landscape. The latest  
383 assessment of the northern subspecies population size is reported as ~3500 (Prakash et al. 2012;  
384 Duckworth et al. 2015; Wildlife Institute of India 2017; Islam et al. 2022), but the methods  
385 through which this assessment have been made (for example, direct count by foot and elephant  
386 back- Sinha et al. 2007; direct count elephant back and vehicle sampling- Ahmed and Khan  
387 2008; focal sampling- Rastogi et al. 2023 method used in Jhilmil Jheel Conservation Reserve  
388 and Dudhwa Tiger Reserve) require detailed validations. There is an urgent need to compare  
389 different population estimation approaches for swamp deer and establish a reliable method for  
390 this. Results from such accurate population estimation across their distribution will strongly  
391 help in re-evaluating the species conservation status (currently considered as ‘Vulnerable’ by  
392 IUCN (Duckworth et al. 2015)) and help in their conservation. This is particularly important  
393 as significant portion of the northern swamp deer distribution is outside protected area regime,  
394 where conventional management/ conservation efforts based on Government regulations are  
395 ineffective. In this regard, future efforts should consider using standard genetic (microsatellites  
396 as in this study and others-Coulon et al. 2006 Frantz et al. 2006 Miotto et al. 2011 Atterby et al.  
397 2015 Vergara et al. 2015) or genomic (SNPs-Edea et al. 2013; Viengkone et al. 2016; Brito et  
398 al. 2017; Hua and Minghai 2017) markers in a mark capture-recapture framework to estimate  
399 swamp deer populations in this landscape (Andreotti et al. 2016; Kierepka et al. 2016; Sethi et



400 al. 2016; Viengkone et al. 2016; Blåhed et al. 2019; Cook et al. 2020; Li et al. 2020) and assess  
401 landscape-scale genetic and demographic parameters, as other standard population estimation  
402 approaches such as Camera Trap, Line Transect- (Andriolo et al. 2005; Fragoso et al. 2016;  
403 Meek et al. 2019; Paul et al. 2019). are not conducive in the human-dominated landscape.  
404 The extensive swamp deer genetic sampling throughout this landscape has provided some  
405 unexpected insights into the species genetic connectivity and health in the Gangetic habitat  
406 block. Earlier studies and information suggested that the swamp deer population in this region  
407 is small, scattered and possibly inbred (due to limited connectivity through human-dominated  
408 areas) (Paul et al. 2018). However, our results clearly disproved such notions regarding swamp  
409 deer movement patterns through the geneflow analyses. The weak genetic structure, random  
410 spatially-distinct distribution of some highly-related individuals (n=16 individuals (13M: 3F),  
411  $r=0.6$ ) and no isolation by distance patterns reflect movement events despite fragmentation in  
412 this landscape. Although very small numbers of related individuals are found in this study, the  
413 implications are very important for this highly-fragmented natural patches of grassland  
414 habitats. Large number of studies conducted on various terrestrial mammalian systems report  
415 a direct relationship between habitat loss/fragmentation and reduction in genetic connectivity  
416 (carnivore- Riley et al. 2006; Carvalho et al. 2018; herbivore- Niedziałkowska et al. 2012;  
417 herbivore- (Fraser et al. 2019); omnivore- (Sato et al. 2014)), but several works on ungulates  
418 corroborate our findings (Caribou- Boulet et al. 2007; Mager et al. 2013 White-tailed deer-  
419 Blanchong et al. 2013; African Buffalo- Epps et al. 2013). Such findings often result from a  
420 complex interplay between the environment dynamics and the species ability to disperse and  
421 breed successfully (Ito et al. 2013; Mager et al. 2013). The radio-telemetry data confirmed  
422 these patterns by providing fine-scale insights on swamp deer dispersal and intensive use of  
423 the grassland patches as ‘stopover sites’ during their movement. Net Squared Displacement  
424 (NSD) results suggested that the two individuals exhibited migratory (Female 2) and mixed

425 migratory (Female 1) patterns, respectively. The stopover sites identified on the movement  
426 routes of both individuals between JJCR and HWLS probably act as important refugia for  
427 swamp deer and aid in maintaining genetic connectivity (as evident from the 2<sup>nd</sup> individual  
428 movement data (Fig. 3b)). These results support earlier reports of swamp deer congregations  
429 during summer months (to feed on young vegetation in the floodplains) and migrations at the  
430 onset of monsoon (Schaaf 1978; Qureshi et al. 2004). Further, the sugarcane fields possibly  
431 help in movement between stopover sights in certain time of the year (Paul et al. 2021), as  
432 reported from other studies from India (Wikramanayake et al. 2004; Athreya et al. 2007, 2013;  
433 Talukdar and Sinha 2013; Warriar et al. 2020). It is however important to realise that these  
434 inferences are based on only two collared individual females, and future efforts to radio-tag  
435 more animals (including both male and females) from different parts of this landscape could  
436 help us to ascertain the main drivers of such seasonal movement events. The spatially  
437 exhaustive, homogenous sampling comprising both male (n=219 individuals) and female  
438 (n=47 individuals) based analyses also indicate non-biased, gender-common movement  
439 pattern, as reported in other cervids (White-tailed deer- Long et al. 2005, 2008, Roe deer-  
440 Gaillard et al. 2008; Bonnot et al. 2010, Red deer- Perez-Espona et al. 2010. Another  
441 encouraging result from this study that has significant swamp deer conservation implications  
442 is the moderate heterozygosity and low inbreeding status of this population. The heterozygosity  
443 value ranged between 0.38 to 0.84 across loci (Average  $H_o$ = 0.51,  $SD$ =0.10) and is consistent  
444 with other deer species (Kuehn et al. 2003; Feulner et al. 2004; Lee et al. 2015; Mukesh et al.  
445 2015), including previous studies on swamp deer (Kumar et al. 2017). However, the low  
446 inbreeding value ( $F_{IS}$ ) contradicts earlier reports from JJCR (Kumar et al. 2017) which forms  
447 only a part of the entire Ganges population. This pattern of genetic admixture, moderate  
448 heterozygosity, relatively low inbreeding and random spatial organisation of related  
449 individuals can be explained to some extent by the species biology and history of this

450 landscape. Till the 1940s-1950s, impenetrable swamps and high incidences of malaria  
451 infestation made this region inhabitable. The subsequent eradication of malaria with  
452 introduction of DDT (as an anti-mosquito agent) and major resettlement of people from  
453 erstwhile East Pakistan by the Government of India (Johnsingh et al. 2004) resulted in a sharp  
454 human-population increase. Severe encroachment of grasslands for agriculture has led to  
455 decline of these swampy grassland habitats from the 70s and 80s (Johnsingh et al. 2004).  
456 Despite such loss of habitats, the seasonal movement behaviour of swamp deer (Martin and  
457 Gopal 2015) helps maintaining genetic mixing among these fragmented grassland patches,  
458 which has earlier been reported as their breeding grounds (Paul et al. 2021). This is also evident  
459 from the patterns of very low pairwise  $F_{ST}$  values (between Zones 1 to 5). Manifestations of  
460 genetic discontinuity might take a longer period as it is reported that  $F_{ST}$  has a lag time of about  
461 200 generations before it can be detected due to the formation of new barriers (Landguth et al.  
462 2010). IBD tests have a much shorter lag period (1–15 generations) to detect barrier effects  
463 (Landguth et al. 2010), but for a vagile species like swamp deer we did not expect to observe  
464 impacts of IBD given the movement patterns seen in this relatively small landscape. Our  
465 results indicate presence of two intermixing swamp deer genetic lineages along the Gangetic  
466 habitat blocks and further efforts are required to understand their origin and status by sampling  
467 the Sharda habitat block, which is the largest population of northern swamp deer. Additionally,  
468 preliminary evidences also indicate slightly different genetic signatures from the samples  
469 collected from the southern part of the study area (zone 5). This area is known to harbour very  
470 low-density swamp deer-occurring habitats (Mondol et al. 2019; Paul et al. 2020) and further  
471 sampling from these areas is required to ascertain the actual patterns.

## 472 **5. Conservation implications**

473 Our genetic and radio-collaring data suggest that despite severe anthropogenic pressures  
474 between JJCR and HWLS, the swamp deer population is connected, retains moderate genetic

475 diversity, and exhibits low levels of inbreeding. These are encouraging signatures for a small,  
476 fragmented and isolated cervid population and should be considered carefully for appropriate  
477 conservation/management plans. It is important to understand that even though the landscape  
478 continues to be functional (active geneflow and animal movement), maintaining the integrity  
479 and functionality with very high human density (1164 people/km<sup>2</sup>- (Census of India 2011) and  
480 associated anthropogenic activities will remain the most important challenge in future. Recent  
481 reports indicate ~57% loss of grassland habitats (to agricultural conversion) along the upper  
482 Gangetic plains during last 30 years (Paul et al. 2021), and therefore conservation of the  
483 identified ‘stopover sites’ is absolutely critical as landscape changes can impact gene flow in  
484 fragmented landscapes (Fraser et al. 2019). Our field-based mapping and radio-telemetry data  
485 points show that majority of the heavily-used stopover sites (at least from the two collared  
486 animals) are found in the non-protected areas bordering the states of Uttarakhand and Uttar  
487 Pradesh. Therefore, we recommend a jointly-prepared protection and grassland recovery plan  
488 by Uttarakhand and Uttar Pradesh Forest departments to control encroachment and grazing  
489 pressures on these grassland patches and ensure functional connectivity between JJCR and  
490 HWLS. Our intensive survey efforts and subsequent identification of individuals indicate an  
491 unequal swamp deer distribution in this landscape, where the area above Bijnor Barrage  
492 harbours more individuals (n=216 individuals in 1714 km<sup>2</sup>) compared to below the Barrage  
493 (n=50 individuals in 1459 km<sup>2</sup>). This corroborates with the available habitat loss information  
494 (~50% loss in upper part of Bijnor Barrage and ~65% loss below Barrage area) (Paul et al.  
495 2021). Recent conservation initiatives have identified “Priority Conservation Areas” (Paul et  
496 al. 2020) in this landscape and ensured government approval of HWLS boundary  
497 reappropriation (Mondol et al. 2019) and therefore it is critical to focus on the management of  
498 the lower part of Bijnor Barrage. The Gangetic ecosystem is highly dynamic and protecting the  
499 grasslands would require collaborative efforts involving multiple stakeholders including

500 several government departments (Ministry of Agriculture and Farmers Welfare, Ministry of  
501 Housing and Urban Affairs, Department of Water Resources, River Development and Ganga  
502 Rejuvenation, Department of Revenue etc.) to strategize appropriate habitat recovery,  
503 plantation management, distribution of minimum numbers of agricultural licenses along rivers,  
504 review of the land tenure/revenue records, the release of water from dams/barrages etc. Such  
505 comprehensive effort only can ensure long-term viability of these productive habitats.

506 Around 5,000 swamp deer remain in the wild globally (Duckworth et al. 2015), but currently  
507 the focus of their conservation is limited to the protected areas (Mondol et al. 2019; Paul et al.  
508 2020). The Gangetic habitat population represents the western-most distribution of the species  
509 and the future is promising, provided that connectivity is maintained and habitat management  
510 becomes an important conservation agenda in immediate future. We hope that the results  
511 presented in this study would bring out the conservation attention to all concerned stakeholders  
512 and help ensuring the long-term persistence of this species outside protected area habitats.  
513 Given that a large number of species are distributed outside protected areas globally, this study  
514 could become an example to deal with the conservation challenges faced by them.

## 515 **6. Reference**

- 516 Ahmed K, Khan JA (2008) Status, population structure and conservation of swamp deer  
517 (*Cervus duvauceli duvauceli*) in Dudhwa Tiger Reserve, Uttar Pradesh, India. *Int J Ecol*  
518 *Environ Sci* 34:75–82
- 519 Andreotti S, Rutzen M, Van Der Walt S, et al (2016) An integrated mark-recapture and  
520 genetic approach to estimate the population size of white sharks in South Africa. *Mar*  
521 *Ecol Prog Ser* 552:241–253. <https://doi.org/10.3354/meps11744>
- 522 Andriolo A, Piovezan U, da Costa MJRP, et al (2005) Aerial line transect survey to estimate  
523 abundance of marsh deer (*Blastocerus dichotomus*) (Illiger, 1815). *Brazilian Arch Biol*  
524 *Technol* 48:807–814. <https://doi.org/10.1590/S1516-89132005000600017>

- 525 Ashrafzadeh MR, Khosravi R, Fernandes C, et al (2021) Assessing the origin, genetic  
526 structure and demographic history of the common pheasant (*Phasianus colchicus*) in the  
527 introduced European range. *Sci Rep* 11:1–14. [https://doi.org/10.1038/s41598-021-](https://doi.org/10.1038/s41598-021-00567-1)  
528 00567-1
- 529 Athreya V, Odden M, Linnell JDC, et al (2013) Big Cats in Our Backyards: Persistence of  
530 Large Carnivores in a Human Dominated Landscape in India. *PLoS One* 8:1–8.  
531 <https://doi.org/10.1371/journal.pone.0057872>
- 532 Athreya V, Thakur SS, Chaudhuri S, Belsare A V (2007) Leopards in human-dominated  
533 areas: a spillover from sustained translocations into nearby forests? *J Bombay Nat Hist*  
534 *Soc* 104:45–50
- 535 Atterby H, Allnutt TR, MacNicol AD, et al (2015) Population genetic structure of the red fox  
536 (*Vulpes vulpes*) in the UK. *Mammal Res* 60:9–19. [https://doi.org/10.1007/s13364-014-](https://doi.org/10.1007/s13364-014-0209-6)  
537 0209-6
- 538 Bashir T, Behera SK, Khan A, Gautam K (2012) An inventory of mammals, birds and  
539 reptiles along a section of the river and banks of upper Ganges, India. *J Threat Taxa*  
540 4:2900–2910. <https://doi.org/10.11609/jott.o2692.2900-10>
- 541 Biswas S, Bhatt S, Paul S, et al (2019) A practice faeces collection protocol for  
542 multidisciplinary research in wildlife science. *Curr Sci* 116:1878–1885.  
543 <https://doi.org/10.18520/cs/v116/i11/1878-1885>
- 544 Blåhed IM, Ericsson G, Spong G (2019) Noninvasive population assessment of moose (*Alces*  
545 *alces*) by SNP genotyping of fecal pellets. *Eur J Wildl Res* 65:.  
546 <https://doi.org/10.1007/s10344-019-1337-8>
- 547 Blanchong JA, Sorin AB, Scribner KT (2013) Genetic diversity and population structure in  
548 urban white-tailed deer. *J Wildl Manage* 77:855–862. <https://doi.org/10.1002/jwmg.521>
- 549 Bonnot N, Gaillard JM, Coulon A, et al (2010) No difference between the sexes in fine-scale

- 550 spatial genetic structure of roe deer. *PLoS One* 5:  
551 <https://doi.org/10.1371/journal.pone.0014436>
- 552 Boulet M, Couturier S, Côté SD, et al (2007) Integrative use of spatial, genetic, and  
553 demographic analyses for investigating genetic connectivity between migratory,  
554 montane, and sedentary caribou herds. *Mol Ecol* 16:4223–4240.  
555 <https://doi.org/10.1111/j.1365-294X.2007.03476.x>
- 556 Brito LF, Kijas JW, Ventura R V., et al (2017) Genetic diversity and signatures of selection  
557 in various goat breeds revealed by genome-wide SNP markers. *BMC Genomics*  
558 18:229:1–20. <https://doi.org/10.1186/s12864-017-3610-0>
- 559 Broquet T, Petit E (2004) Quantifying genotyping errors in noninvasive population genetics.  
560 *Mol Ecol* 13:3601–3608. <https://doi.org/10.1111/j.1365-294X.2004.02352.x>
- 561 Bunnefeld N, Börger L, Van Moorter B, et al (2011) A model-driven approach to quantify  
562 migration patterns: Individual, regional and yearly differences. *J Anim Ecol* 80:466–  
563 476. <https://doi.org/10.1111/j.1365-2656.2010.01776.x>
- 564 Carvalho F, Lourenço A, Carvalho R, et al (2018) The effects of a motorway on movement  
565 behaviour and gene flow in a forest carnivore: Joint evidence from road mortality, radio  
566 tracking and genetics. *Landsc Urban Plan* 178:217–227.  
567 <https://doi.org/10.1016/j.landurbplan.2018.06.007>
- 568 Ceballos G, Davidson A, List R, et al (2010) Rapid decline of a grassland system and its  
569 ecological and conservation implications. *PLoS One* 5:e8562.  
570 <https://doi.org/10.1371/journal.pone.0008562>
- 571 Chapuis MP, Estoup A (2007) Microsatellite null alleles and estimation of population  
572 differentiation. *Mol Biol Evol* 24:621–631. <https://doi.org/10.1093/molbev/msl191>
- 573 Cook GM, Prince DJ, O'Rourke SM, et al (2020) A little SNP of this, a little SNP of that:  
574 The discovery of 116 single nucleotide polymorphism markers to enable the rapid

575 identification of individual Pacific walrus (*Odobenus rosmarus divergens*). *Conserv*  
576 *Genet Resour* 12:555–565. <https://doi.org/10.1007/s12686-020-01156-6>

577 Coulon A, Guillot G, Cosson JF, et al (2006) Genetic structure is influenced by landscape  
578 features: Empirical evidence from a roe deer population. *Mol Ecol* 15:1669–1679.  
579 <https://doi.org/10.1111/j.1365-294X.2006.02861.x>

580 Coulson TN, Pemberton JM, Albon SD, et al (1998) Microsatellites reveal heterosis in red  
581 deer. *Proc R Soc B Biol Sci* 265:489–495. <https://doi.org/10.1098/rspb.1998.0321>

582 Csencsics D, Brodbeck S, Holderegger R (2010) Cost-effective, species-specific  
583 microsatellite development for the endangered dwarf bulrush (*Typha minima*) using  
584 next-generation sequencing technology. *J Hered* 101:789–793.  
585 <https://doi.org/10.1093/jhered/esq069>

586 D'Aloia CC, Xuereb A, Fortin MJ, et al (2018) Limited dispersal explains the spatial  
587 distribution of siblings in a reef fish population. *Mar Ecol Prog Ser* 607:143–154.  
588 <https://doi.org/10.3354/meps12792>

589 De R, Sharma R, Davidar P, et al (2021) Pan-India population genetics signifies the  
590 importance of habitat connectivity for wild Asian elephant conservation. *Glob Ecol*  
591 *Conserv* 32:e01888. <https://doi.org/10.1016/j.gecco.2021.e01888>

592 Dempster AP, Laird NM, Rubin DB (1977) Maximum Likelihood from Incomplete Data Via  
593 the EM Algorithm. *J R Stat Soc Ser B* 39:1–22. [https://doi.org/10.1111/j.2517-](https://doi.org/10.1111/j.2517-6161.1977.tb01600.x)  
594 [6161.1977.tb01600.x](https://doi.org/10.1111/j.2517-6161.1977.tb01600.x)

595 Dorji S, Rajaratnam R, Vernes K (2019) Mammal richness and diversity in a Himalayan  
596 hotspot: the role of protected areas in conserving Bhutan's mammals. *Biodivers Conserv*  
597 28:3277–3297. <https://doi.org/10.1007/s10531-019-01821-9>

598 Duckworth JW, Kumar NS, Pokharel CP, et al (2015) *Rucervus duvaucelii*, Barasingha View  
599 on [www.iucnredlist.org](http://www.iucnredlist.org) THE IUCN RED LIST OF THREATENED SPECIES.



- 600 eT4257A22167675. <https://doi.org/http://dx.doi.org/10.2305/IUCN.UK.2015->  
601 4.RLTS.T4257A22167675.en
- 602 Earl DA, vonHoldt BM (2012) STRUCTURE HARVESTER: A website and program for  
603 visualizing STRUCTURE output and implementing the Evanno method. *Conserv Genet*  
604 *Resour* 4:359–361. <https://doi.org/10.1007/s12686-011-9548-7>
- 605 Edea Z, Dadi H, Kim SW, et al (2013) Genetic diversity, population structure and  
606 relationships in indigenous cattle populations of Ethiopia and Korean hanwoo breeds  
607 using SNP markers. *Front Genet* 4:1–9. <https://doi.org/10.3389/fgene.2013.00035>
- 608 Ellerman J, Morridon-Scott TC. (1951) *Checklist of Palaeractic and Indian Mammals*. London,  
609 Uk
- 610 Epps CW, Castillo JA, Schmidt-Küntzel A, et al (2013) Contrasting historical and recent  
611 gene flow among African buffalo herds in the caprivi strip of Namibia. *J Hered*  
612 104:172–181. <https://doi.org/10.1093/jhered/ess142>
- 613 Estes-Zumpf WA, Rachlow JL, Waits LP, Warheit KI (2010) Dispersal, gene flow, and  
614 population genetic structure in the pygmy rabbit (*brachylagus idahoensis*). *J Mammal*  
615 91:208–219. <https://doi.org/10.1644/09-MAMM-A-032R.1>
- 616 Excoffier L, Laval G, Schneider S (2005) Arlequin (version 3.0): An integrated software  
617 package for population genetics data analysis. *Evol Bioinforma* 1:117693430500100.  
618 <https://doi.org/10.1177/117693430500100003>
- 619 Feulner PGD, Bielfeldt W, Zachos FE, et al (2004) Mitochondrial DNA and microsatellite  
620 analysis of the genetic status of the presumed subspecies *Cervus elaphus montanus*  
621 (Carpathian red deer). *Heredity (Edinb)* 93:299–306.  
622 <https://doi.org/10.1038/sj.hdy.6800504>
- 623 Fragoso JMV, Levi T, Oliveira LFB, et al (2016) Line transect surveys underdetect terrestrial  
624 mammals: Implications for the sustainability of subsistence hunting. *PLoS One*

- 625 11:e0152659. <https://doi.org/10.1371/journal.pone.0152659>
- 626 Frantz AC, Pourtois JT, Heuertz M, et al (2006) Genetic structure and assignment tests  
627 demonstrate illegal translocation of red deer (*Cervus elaphus*) into a continuous  
628 population. *Mol Ecol* 15:3191–3203. <https://doi.org/10.1111/j.1365-294X.2006.03022.x>
- 629 Fraser DL, Ironside K, Wayne RK, Boydston EE (2019) Connectivity of mule deer  
630 (*Odocoileus hemionus*) populations in a highly fragmented urban landscape. *Landsc  
631 Ecol* 34:1097–1115. <https://doi.org/10.1007/s10980-019-00824-9>
- 632 Gaillard JM, Hewison AJM, Kjellander P, et al (2008) Population density and sex do not  
633 influence fine-scale natal dispersal in roe deer. *Proc R Soc B Biol Sci* 275:2025–2030.  
634 <https://doi.org/10.1098/rspb.2008.0393>
- 635 Ghosh T, Sharma A, Mondol S (2021) Optimisation and application of a forensic  
636 microsatellite panel to combat Greater-one horned rhinoceros (*Rhinoceros unicornis*)  
637 poaching in India. *Forensic Sci Int Genet* 52:102472.  
638 <https://doi.org/10.1016/j.fsigen.2021.102472>
- 639 GIBBS HL, PRIOR KA, JOHNSON PJWG (1997) Genetic structure of populations of the  
640 threatened eastern massasauga rattlesnake, *Sistrurus c. catenatus*: evidence from  
641 microsatellite DNA markers. *Mol Ecol* 6:1123–1132
- 642 Goudet J (2002) FSTAT Software
- 643 Grimmett R, Carol I, Tim I (2013) *Birds of the Indian Subcontinent*. Oxford University Press,  
644 India
- 645 Groves CP (1982) Geographic variation in the barasingha or swamp deer. *J  
646 of the Bombay Natural History Society* 79:620–629
- 647 Guillot G, Mortier F, Estoup A (2005) GENELAND: A computer package for landscape  
648 genetics. *Mol Ecol Notes* 5:712–715. <https://doi.org/10.1111/j.1471-8286.2005.01031.x>
- 649 Gupta SK, Kumar A, Hussain SA (2013) Extraction of PCR-amplifiable DNA from a variety

- 650 of biological samples with uniform success rate. *Conserv Genet Resour* 5:215–217.
- 651 <https://doi.org/10.1007/s12686-012-9772-9>
- 652 Gupta SK, Kumar A, Hussain SA (2014) Novel primers for sequencing of the complete  
653 mitochondrial cytochrome b gene of ungulates using non-invasive and degraded  
654 biological samples. *Conserv Genet Resour* 6:499–501. [https://doi.org/10.1007/s12686-](https://doi.org/10.1007/s12686-014-0143-6)  
655 [014-0143-6](https://doi.org/10.1007/s12686-014-0143-6)
- 656 Gustafson KD, Vickers TW, Boyce WM, Ernest HB (2017) A single migrant enhances the  
657 genetic diversity of an inbred puma population. *R Soc Open Sci* 4:.  
658 <https://doi.org/10.1098/rsos.170115>
- 659 Harihar A (2011) Understanding the response of wild ungulate prey to livestock-mediated  
660 competition in western Terai Arc Landscape , India : implications for developing  
661 management strategies to restore corridors. A Rep to Rufford Small Grant Nat Conserv
- 662 He XX, Chang Y, Jiang HJ, et al (2010) Persistent effect of IFNAR-1 genetic polymorphism  
663 on the long-term pathogenesis of chronic HBV infection. *Viral Immunol* 23:251–257.  
664 <https://doi.org/10.1089/vim.2009.0102>
- 665 Hernández M, Palmarola A, Testé E, et al (2020) Population structure and genetic diversity  
666 of *Magnolia cubensis* subsp. *acunae* (Magnoliaceae): Effects of habitat fragmentation  
667 and implications for conservation. *Oryx* 54:451–459.  
668 <https://doi.org/10.1017/S003060531900053X>
- 669 Heuertz M, Hausman JF, Hardy OJ, et al (2004) Nuclear microsatellites reveal contrasting  
670 patterns of genetic structure between western and southeastern European populations of  
671 the common ash (*Fraxinus excelsior* L.). *Evolution* (N Y) 58:976–988.  
672 <https://doi.org/10.1111/j.0014-3820.2004.tb00432.x>
- 673 Hoffman JI, Amos W (2005) Microsatellite genotyping errors: Detection approaches,  
674 common sources and consequences for paternal exclusion. *Mol Ecol* 14:599–612.

- 675 <https://doi.org/10.1111/j.1365-294X.2004.02419.x>
- 676 Hua LY, Minghai Z (2017) The genetic diversity of tibetan red deer populations determined  
677 using mitochondrial and microsatellite markers. *Int J Agric Biol* 19:1286–1292.  
678 <https://doi.org/10.17957/IJAB/15.0453>
- 679 India C of (2011) Census of India. New Delhi: Registrar General & Census Commissioner of  
680 India
- 681 Isaac NJB, Turvey ST, Collen B, et al (2007) Mammals on the EDGE: Conservation  
682 priorities based on threat and phylogeny. *PLoS One* 2:.  
683 <https://doi.org/10.1371/journal.pone.0000296>
- 684 Islam N, Ahmed A, Barman R, et al (2022) Revival of Eastern Swamp Deer *Rucervus*  
685 *duvaucelii ranjitsinhi* (Groves, 1982) in Manas Natonal Park of Assam, India. *J Threat*  
686 *Taxa* 14:20488–20493. <https://doi.org/10.11609/jot.7670.14.1.20488-20493>
- 687 Ito TY, Lhagvasuren B, Tsunekawa A, et al (2013) Fragmentation of the Habitat of Wild  
688 Ungulates by Anthropogenic Barriers in Mongolia. *PLoS One* 8:.  
689 <https://doi.org/10.1371/journal.pone.0056995>
- 690 Johnsingh AJT, Ramesh K, Qureshi Q, et al (2004) Conservation Status of Tiger and  
691 Associated Species in the Terai Arc Landscape , India Conservation Status of Tiger and  
692 Associated Species in the Terai Arc Landscape , India. RR-04/001, Wildl Inst India,  
693 Dehradun Pp. viii+110
- 694 Johnson RN, Wilson-Wilde L, Linacre A (2014) Current and future directions of DNA in  
695 wildlife forensic science. *Forensic Sci Int Genet* 10:1–11.  
696 <https://doi.org/10.1016/j.fsigen.2013.12.007>
- 697 Jombart T, Devillard S, Balloux F (2010) Discriminant analysis of principal components: a  
698 new method for the analysis of genetically structured populations. *BMC Genet* 11:94:  
699 <https://doi.org/http://www.biomedcentral.com/1471-2156/11/94> Page

- 700 Kaczensky P, Kuehn R, Lhagvasuren B, et al (2011) Connectivity of the Asiatic wild ass  
701 population in the Mongolian Gobi. *Biol Conserv* 144:920–929.  
702 <https://doi.org/10.1016/j.biocon.2010.12.013>
- 703 Kalinowski ST, Taper ML, Marshall TC (2007) Revising how the computer program  
704 CERVUS accommodates genotyping error increases success in paternity assignment.  
705 *Mol Ecol* 16:1099–1106. <https://doi.org/10.1111/j.1365-294X.2007.03089.x>
- 706 Kalinowski ST, Wagner AP, Taper ML (2006) ML-RELATE: A computer program for  
707 maximum likelihood estimation of relatedness and relationship. *Mol Ecol Notes* 6:576–  
708 579. <https://doi.org/10.1111/j.1471-8286.2006.01256.x>
- 709 Karanth KK, Nichols JD, Karanth UK, et al (2010) The shrinking ark: Patterns of large  
710 mammal extinctions in India. *Proc R Soc B Biol Sci* 277:1971–1979.  
711 <https://doi.org/10.1098/rspb.2010.0171>
- 712 Khan A, Khan JA (1999) Conservation of swamp deer (*Cervus duvauceli duvauceli*) in  
713 Hastinapur Wildlife Sanctuary. In: *Proceedings of the 4th International Deer Biology*  
714 *Congress*. Hungary, pp 194–199
- 715 Khan JA, Khan A, Khan AA (2003) Structure and composition of barasingha habitat in  
716 Hastinapur Wildlife Sanctuary. Tech Rep No 14, Wildl Soc India, AMU, Aligarh 57
- 717 Kierepka EM, Unger SD, Keiter DA, et al (2016) Identification of robust microsatellite  
718 markers for wild pig fecal DNA. *J Wildl Manage* 80:1120–1128.  
719 <https://doi.org/10.1002/jwmg.21102>
- 720 Kock MD, Jessup DA, Clark RK, et al (1987) Capture methods in five subspecies of free-  
721 ranging bighorn sheep: an evaluation of drop-net, drive-net, chemical immobilization  
722 and the net-gun. *J Wildl Dis* 23:634–640. <https://doi.org/10.7589/0090-3558-23.4.634>
- 723 Kuehn R, Schroeder W, Pirchner F, Rottmann O (2003) Genetic diversity, gene flow and drift  
724 in Bavarian red deer populations (*Cervus elaphus*). *Conserv Genet* 4:157–166.

- 725 <https://doi.org/10.1023/A:1023394707884>
- 726 Kumar A, Ghazi MGU, Hussain SA, et al (2017) Mitochondrial and Nuclear DNA Based  
727 Genetic Assessment Indicated Distinct Variation and Low Genetic Exchange Among the  
728 Three Subspecies of Swamp Deer (*Rucervus duvaucelii*). *Evol Biol* 44:31–42.  
729 <https://doi.org/10.1007/s11692-016-9387-2>
- 730 Landguth EL, Cushman SA, Schwartz MK, et al (2010) Quantifying the lag time to detect  
731 barriers in landscape genetics. *Mol Ecol* 19:4179–4191. [https://doi.org/10.1111/j.1365-](https://doi.org/10.1111/j.1365-294X.2010.04808.x)  
732 [294X.2010.04808.x](https://doi.org/10.1111/j.1365-294X.2010.04808.x)
- 733 Lee YS, Markov N, Voloshina I, et al (2015) Genetic diversity and genetic structure of the  
734 Siberian roe deer (*Capreolus pygargus*) populations from Asia. *BMC Genet* 16:1–15.  
735 <https://doi.org/10.1186/s12863-015-0244-6>
- 736 Li Y, Li N, Chen L, et al (2020) Estimating abundance of siberian roe deer using fecal-dna  
737 capture-mark-recapture in Northeast China. *Animals* 10:1–14.  
738 <https://doi.org/10.3390/ani10071135>
- 739 Linacre A, Gusmão L, Hecht W, et al (2011) ISFG: Recommendations regarding the use of  
740 non-human (animal) DNA in forensic genetic investigations. *Forensic Sci Int Genet*  
741 5:501–505. <https://doi.org/10.1016/j.fsigen.2010.10.017>
- 742 Long ES, Diefenbach DR, Rosenberry CS, et al (2005) Forest cover influences dispersal  
743 distance of white-tailed deer. *J Mammal* 86:623–629. [https://doi.org/10.1644/1545-](https://doi.org/10.1644/1545-1542(2005)86[623:FCIDDO]2.0.CO;2)  
744 [1542\(2005\)86\[623:FCIDDO\]2.0.CO;2](https://doi.org/10.1644/1542(2005)86[623:FCIDDO]2.0.CO;2)
- 745 Long ES, Diefenbach DR, Rosenberry CS, Wallingford BD (2008) Multiple proximate and  
746 ultimate causes of natal dispersal in white-tailed deer. *Behav Ecol* 19:1235–1242.  
747 <https://doi.org/10.1093/beheco/arn082>
- 748 López-Olvera JR, Marco I, Montané J, et al (2009) Comparative evaluation of effort, capture  
749 and handling effects of drive nets to capture roe deer (*Capreolus capreolus*), Southern

- 750 chamois (*Rupicapra pyrenaica*) and Spanish ibex (*Capra pyrenaica*). *Eur J Wildl Res*  
751 55:193–202. <https://doi.org/10.1007/s10344-008-0232-5>
- 752 Mager KH, Colson KE, Hundertmark KJ (2013) High genetic connectivity and introgression  
753 from domestic reindeer characterize northern Alaska caribou herds. *Conserv Genet*  
754 14:1111–1123. <https://doi.org/10.1007/s10592-013-0499-2>
- 755 Martin C, Gopal R (2015) Barasingha (Indian swamp deer) *Rucervus duvaucelii*. In  
756 *Mammals of South Asia, Volume 2* (Eds A.J.T. Johnsingh and N. Manjrekar).  
757 Universities press, India
- 758 Meek PD, Ballard GA, Sparkes J, et al (2019) Camera trap theft and vandalism: occurrence,  
759 cost, prevention and implications for wildlife research and management. *Remote Sens*  
760 *Ecol Conserv* 5:160–168. <https://doi.org/10.1002/rse2.96>
- 761 Miotto RA, Cervini M, Figueiredo MG, et al (2011) Genetic diversity and population  
762 structure of pumas (*Puma concolor*) in southeastern Brazil: Implications for  
763 conservation in a human-dominated landscape. *Conserv Genet* 12:1447–1455.  
764 <https://doi.org/10.1007/s10592-011-0243-8>
- 765 Miquel C, Bellemain E, Poillot C, et al (2006) Quality indexes to assess the reliability of  
766 genotypes in studies using noninvasive sampling and multiple-tube approach. *Mol Ecol*  
767 *Notes* 6:985–988. <https://doi.org/10.1111/j.1471-8286.2006.01413.x>
- 768 Modi S, Mondol S, Ghaskadbi P, et al (2018) Noninvasive DNA-based species and sex  
769 identification of Asiatic wild dog (*Cuon alpinus*). *J Genet* 97:1457–1461.  
770 <https://doi.org/10.1007/s12041-018-1017-6>
- 771 Mondol, S., Pandav, B., Kumar, M., Paul, S., Saha S (2019) Assessment of wildlife habitats  
772 with special focus on swamp deer in Hastinapur Wildlife Sanctuary, Uttar Pradesh,  
773 India. Report submitted to Uttar Pradesh Forest Department. pp 1-33 TR No./2019/07
- 774 Morrison JC, Sechrest W, Dinerstein E, et al (2007) Persistence of large mammal faunas as

- 775 indicators of global human impacts. *J Mammal* 88:1363–1380.
- 776 <https://doi.org/10.1644/06-MAMM-A-124R2.1>
- 777 Mukesh, Sharma LK, Charoo SA, Sathyakumar S (2015) Species identification and  
778 molecular sexing from feces of Kashmir stag (*Cervus elaphus hanglu*). *Conserv Genet*  
779 *Resour* 7:677–680. <https://doi.org/10.1007/s12686-015-0475-x>
- 780 Niedziałkowska M, Jędrzejewska B, Wójcik JM, Goodman SJ (2012) Genetic structure of red  
781 deer population in northeastern Poland in relation to the history of human interventions.  
782 *J Wildl Manage* 76:1264–1276. <https://doi.org/10.1002/jwmg.367>
- 783 Paul S, Ghosh T, Pandav B, et al (2019) Rapid molecular assays for species and sex  
784 identification of swamp deer and other coexisting cervids in human-dominated  
785 landscapes of the Terai region and upper Gangetic plains, northern India: implications in  
786 understanding species distribution and population. *J Genet* 98:  
787 <https://doi.org/10.1007/s12041-019-1094-1>
- 788 Paul S, Pandav B, Mohan D, et al (2018) Current distribution and status of swamp deer  
789 *Rucervus duvaucelii duvaucelii* in the upper Gangetic plains of north India. *Oryx*  
790 52:646–653. <https://doi.org/10.1017/S0030605318000078>
- 791 Paul S, Saha S, Nigam P, et al (2021) Waning grasslands: a quantitative temporal evaluation  
792 of the grassland habitats across human-dominated upper Gangetic Plains, north India.  
793 bioRxiv. <https://doi.org/https://doi.org/10.1101/2021.10.10.463811>
- 794 Paul S, Sarkar D, Patil A, et al (2020) Assessment of endemic northern swamp deer  
795 (*Rucervus duvaucelii duvaucelii*) distribution and identification of priority conservation  
796 areas through modeling and field surveys across north India. *Glob Ecol Conserv*  
797 24:e01263. <https://doi.org/10.1016/j.gecco.2020.e01263>
- 798 Perez-Espona S, Pérez-Barbería FJ, Jiggins CD, et al (2010) Variable extent of sex-biased  
799 dispersal in a strongly polygynous mammal. *Mol Ecol* 19:3101–3113.



- 800 <https://doi.org/10.1111/j.1365-294X.2010.04733.x>
- 801 Pocock RI (1943) The largest deer of British India, partII. J Bombay Nat Hist Soc 43:553–  
802 572
- 803 Pompanon F, Bonin A, Bellemain E, Taberlet P (2005) Genotyping errors: Causes,  
804 consequences and solutions. Nat Rev Genet 6:847–859. <https://doi.org/10.1038/nrg1707>
- 805 Prakash R, Nayak K, Pandey RK, et al (2012) Habitat Viability Analysis for the Proposed  
806 Reintroduction Site for the Hard-ground Barasingha (*Cervus duvauceli branderi*) in the  
807 Bori Wildlife Sanctuary, Satpura Tiger Reserve (Madhya Pradesh). India
- 808 Puill-Stephan E, Willis BL, van Herwerden L, van Oppen MJH (2009) Chimerism in wild  
809 adult populations of the broadcast spawning coral *Acropora millepora* on the Great  
810 Barrier Reef. PLoS One 4:. <https://doi.org/10.1371/journal.pone.0007751>
- 811 Punjabi GA, Rao MK (2017) Large herbivore populations outside protected areas in the  
812 human-dominated Western Ghats, India. Mamm Biol 87:27–35.  
813 <https://doi.org/10.1016/j.mambio.2017.05.004>
- 814 Qureshi Q, Sawarkar VB, Rahmani AR, Mathur PK (2004) Swamp deer or barasingha  
815 (*Cervus duvauceli* Cuvier, 1823). In: Sankar, K., Goyal, S.P. (Eds.), Ungulates of India,  
816 Envis Bulletin: Wildlife and Protected Areas. Wildl Inst India, Dehradun, India 7:181–  
817 192
- 818 Rastogi S, Bista A, Pathak SK, et al (2023) Status of Swamp Deer *Rucervus duvaucelii*  
819 *duvaucelii* (*G. cuvier*, 1823) in grassland-wetland habitats ion Dudhwa Tiger Reserve,  
820 India. 15:22501–22504
- 821 Riley SPD, Pollinger JP, Sauvajot RM, et al (2006) A southern California freeway is a  
822 physical and social barrier to gene flow in carnivores. Mol Ecol 15:1733–1741.  
823 <https://doi.org/10.1111/j.1365-294X.2006.02907.x>
- 824 Ripple WJ, Chapron G, López-Bao JV, et al (2016) Saving the World’s Terrestrial

- 825 Megafauna. *Bioscience* 66:807–812. <https://doi.org/10.1093/biosci/biw092>
- 826 Ripple WJ, Newsome TM, Wolf C, et al (2015) Collapse of the world’s largest herbivores.  
827 *Sci Adv* 1, e140010:. <https://doi.org/10.1126/sciadv.1400103>
- 828 Rodzen JA, Famula TR, May B (2004) Estimation of parentage and relatedness in the  
829 polyploid white sturgeon (*Acipenser transmontanus*) using a dominant marker approach  
830 for duplicated microsatellite loci. *Aquaculture* 232:165–182.  
831 [https://doi.org/10.1016/S0044-8486\(03\)00450-2](https://doi.org/10.1016/S0044-8486(03)00450-2)
- 832 Sankaran R (1989) Status of the swamp deer in Dudhwa National Park (1988-1989)  
833 Technical Report No. 14. Bombay
- 834 Sato JJ, Kawakami T, Tasaka Y, et al (2014) A few decades of habitat fragmentation has  
835 reduced population genetic diversity: A case study of landscape genetics of the large  
836 Japanese field mouse, *Apodemus speciosus*. *Mammal Study* 39:1–10.  
837 <https://doi.org/10.3106/041.039.0102>
- 838 Sawyer H, Kauffman MJ (2011) Stopover ecology of a migratory ungulate. *J Anim Ecol*  
839 80:1078–1087. <https://doi.org/10.1111/j.1365-2656.2011.01845.x>
- 840 Schaaf CD (1978) POPULATION SIZE AND STRUCTURE AND HABITAT RELATIONS  
841 OF THE BARASINGHA (*CERVUS Q, DUVAUCELI*) IN SUKLA PHANTA  
842 WILDLIFE RESERVE, NEPAL. A Diss Submitt to Dep Fish Wiidiife
- 843 Schaller GB (1967) *The Deer and the Tiger- A study of Wildlife in India*. The University of  
844 Chicago Press, Chicago and London
- 845 Schipper J, Chanson JS, Chiozza F, et al (2008) The Status of the World’s Land and Marine  
846 Mammals: Diversity, Threat, and Knowledge. *Science* (80- ) 322:225–230
- 847 Schuelke M (2000) An economic method for the fluorescent labeling of PCR fragments. *Nat*  
848 *Biotechnol* 18:233–234. <https://doi.org/10.1038/72708>
- 849 Sethi SA, Linden D, Wenburg J, et al (2016) Accurate recapture identification for genetic

- 850 mark–Recapture studies with error-tolerant likelihood-based match calling and sample  
851 clustering. *R Soc Open Sci* 3:. <https://doi.org/10.1098/rsos.160457>
- 852 Sinha SP, Chandola S, Sinha BC (2007) Sighting of Swamp Deer in Uttarakhand. *Zoos' Print*  
853 XXII:9–10
- 854 Talukdar BK, Sinha SP (2013) Challenges and opportunities of transboundary rhino  
855 conservation in India and Nepal. *Pachyderm* 54:45–51
- 856 Tewari R, Rawat GS (2013a) Studies on the Food and Feeding Habits of Swamp Deer  
857 (*Rucervus duvaucelii duvaucelii*) in Jhilmil Jheel Conservation Reserve, Haridwar,  
858 Uttarakhand, India. *ISRN Zool Article ID*:1–6. <https://doi.org/10.1155/2013/278213>
- 859 Tewari R, Rawat GS (2013b) ASSESSMENT OF SWAMP DEER HABITAT IN AND  
860 AROUND JHILMIL JHEEL CONSERVATION RESERVE, HARIDWAR,  
861 UTTARAKHAND, INDIA. *Int J Conserv Sci* 4:243–249
- 862 Tewari R, Rawat GS (2013c) Activity pattern and diurnal time budget of Swamp Deer  
863 (*Rucervus Duvaucelii duvaucelii*) in Jhilmil Jheel Conservation Reserve, Haridwar,  
864 Uttarakhand, India. *NeBIO IV*:36–40
- 865 Tewari R, Rawat GS (2013d) Factors influencing seasonal changes in the herd size and  
866 composition of swamp deer in Jhilmil Jheel Conservation Reserve, Haridwar,  
867 Uttarakhand, India. *Int J Pharm LIFE Sci* 4:2870–2875
- 868 Tewari R, Rawat GS (2013e) Habitat Use of Swamp Deer (*Rucervus duvaucelii duvaucelii*)  
869 in Jhilmil Jheel Conservation Reserve, Haridwar, Uttarakhand, India. *Int J Ecol Environ*  
870 *Sci* 39:79–85
- 871 Valière N (2002) a computer program for analysing genetic GIMLET. *Mol Ecol Notes*  
872 2:377–379. <https://doi.org/10.1046/j.1471-8278>
- 873 Van Oosterhout C, Hutchinson WF, Wills DPM, Shipley P (2004) MICRO-CHECKER:  
874 Software for identifying and correcting genotyping errors in microsatellite data. *Mol*

- 875 Ecol Notes 4:535–538. <https://doi.org/10.1111/j.1471-8286.2004.00684.x>
- 876 Venegas C, Varas V, Vásquez JP, Marín JC (2020) Non-invasive genetic sampling of deer: A  
877 method for DNA extraction and genetic analysis from antlers. *Gayana* 84:75–82.  
878 <https://doi.org/10.4067/S0717-65382020000100075>
- 879 Vergara M, Basto MP, Madeira MJ, et al (2015) Inferring population genetic structure in  
880 widely and continuously distributed carnivores: The stone marten (*Martes foina*) as a  
881 case study. *PLoS One* 10:1–20. <https://doi.org/10.1371/journal.pone.0134257>
- 882 Viengkone M, Derocher AE, Richardson ES, et al (2016) Assessing polar bear (*Ursus*  
883 *maritimus*) population structure in the Hudson Bay region using SNPs. *Ecol Evol*  
884 6:8474–8484. <https://doi.org/10.1002/ece3.2563>
- 885 Wall J (2014) Movement Ecology Tools for ArcGIS (ArcMET) Version: 10.2.2 v3
- 886 Wall J, Wittemyer G, Klinkenberg B, et al (2013) Characterizing properties and drivers of  
887 long distance movements by elephants (*Loxodonta africana*) in the Gourma, Mali. *Biol*  
888 *Conserv* 157:60–68. <https://doi.org/10.1016/j.biocon.2012.07.019>
- 889 Warriar R, Noon BR, Bailey L (2020) Agricultural lands offer seasonal habitats to tigers in a  
890 human-dominated and fragmented landscape in India. *Ecosphere* 11:.  
891 <https://doi.org/10.1002/ecs2.3080>
- 892 Wikramanayake E, McKnight M, Dinerstein E, et al (2004) Designing a conservation  
893 landscape for tigers in human-dominated environments. *Conserv Biol* 18:839–844.  
894 <https://doi.org/10.1111/j.1523-1739.2004.00145.x>
- 895 Wildlife Institute of India (2017) National Studbook Swamp Deer (*Rucervus duvaucelii*).  
896 Wildl Inst India, Dehradun Cent Zoo Authority, New Delhi TR No 2017/ 011 41
- 897 Zachos FE, Frantz AC, Kuehn R, et al (2016) Genetic Structure and Effective Population  
898 Sizes in European Red Deer (*Cervus elaphus*) at a Continental Scale: Insights from  
899 Microsatellite DNA. *J Hered* 107:318–326. <https://doi.org/10.1093/jhered/esw011>

900 **Statements and Declarations**

901 **Author contributions**

902 SM, DM, BP conceived the study idea. SM and BP generated funds and supervised the study.

903 BH procured the collars. PN spearheaded the collaring-operation. SP, BP, SM, DM and BH all

904 supported in collaring-operation. SP conducted sampling and data generation. SS and GP

905 supported in data generation and analysis. SP and SM wrote the initial manuscript. SP, SM and

906 SS revised the draft and all authors approved the final draft.

907 **Funding**

908 This research was funded by Forest Departments of Uttarakhand, Uttar Pradesh and MOEFCC

909 (No. 244/2018/RE). Samrat Mondol was supported by the Department of Science and

910 Technology INSPIRE Faculty Award (Grant No. IFA12-LSBM-47) and Shrutarshi Paul was

911 awarded Department of Science and Technology INSPIRE Research Fellowship (IF150680).

912 The funders had no role in study design, data collection and analysis decision to publish, or

913 preparation of the manuscript.

914 **Data availability**

915 The data generated in this study is available in Figshare

916 (<https://figshare.com/s/fe0cb79541ca8b3ae2ea>)

917 **Competing interests**

918 The authors have not disclosed any competing interests

919

920

921

922

923

924

925 **Figure Legend:**

926 **Fig. 1:** Representation of the study area and sampling efforts between Jhilmil Jheel  
927 Conservation Reserve (JJCR), Uttarakhand and Hastinapur Wildlife Sanctuary (HWLS), Uttar  
928 Pradesh. The section (a) (left panel) shows the protected areas (JJCR and HWLS) along with  
929 all the digitized grassland patches along the rivers Ganges and its tributaries Banganga and  
930 Solani. The section (b) (right panel) shows the locations of various types of samples used in  
931 this study within five distinct study blocks (24 km long stretches based on earlier recorded  
932 swamp deer movement patterns) along river Ganges.

933 **Fig. 2:** Outcomes of various Bayesian (STRUCTURE and GENELAND) and non-Bayesian  
934 (DAPC) genetic connectivity analyses for northern swamp deer. Panel (a) shows the  
935 distribution of different swamp deer genetic groups across this landscape; Panel (b) shows the  
936 DAPC results indicating genetic clusters (K=5) corresponding to the five study blocks; Panel  
937 (c) showing the genetic admixture patterns of the identified individuals based on sampled study  
938 blocks and; Panel (d) showing GENELAND outputs at K=2 where clear genetic discontinuity  
939 of study block 5 is depicted.

940 **Fig. 3:** Movement patterns of two collared swamp deer females. Both panels (a) and (b) show  
941 the movement trajectory paths, intensive use areas and stopover sites along the river Ganges.  
942 Panels (c) and (d) shows the NSDs of the respective individuals depicting their migration types.

943 **Supplementary Fig. 1:** Representation of spatial heterogeneity among some related  
944 individuals ( $r > 0.6$ ) sampled in our survey, indicating genetic connectivity and recent  
945 movement events within this landscape. Each pair of related individuals (total eight pairs) is  
946 indicated by same symbols presented in the figure.

947 **Table Legend:**

948 **Table 1:** Summary statistics of the 13 microsatellite loci used for population genetic analyses  
949 of swamp deer in this study.

950 **Table 2:** Genetic differentiation (pairwise  $F_{st}$ ) between five study blocks in the upper Gangetic  
951 plains, north India.

952 **Table 3:** Basic movement parameters calculated for the two collared swamp deer females in  
953 this study.

954 **Supplementary Table 1:** Details (Grasslands, Blocks, Districts, States) of all locations of the  
955 antlers and pellets collected in this study.

956 **Supplementary Table 2:** Details of the initial set of 48 primers tested for swamp deer  
957 individual identification.

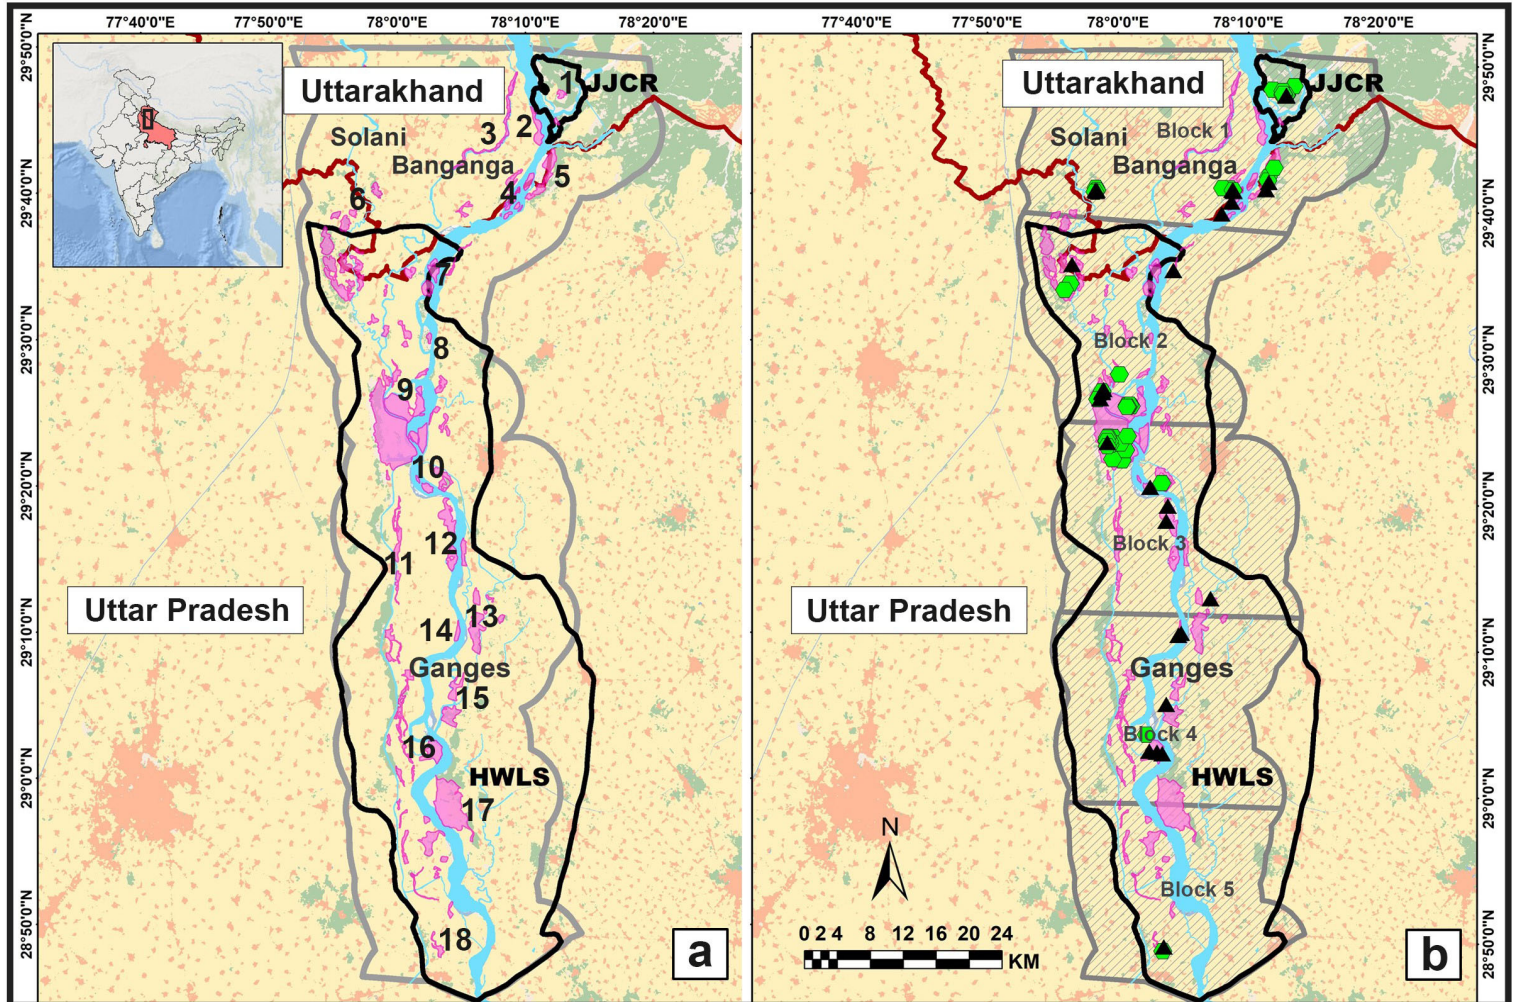

## Legend

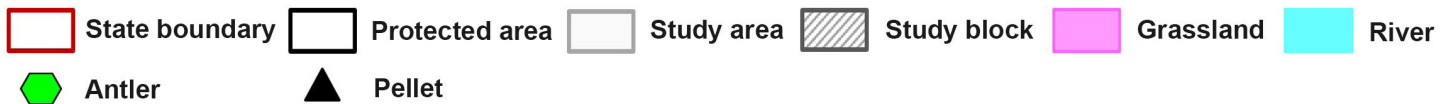

- 1 Jhilmil Jheel Conservation Reserve 2 Bhogpur 3 Banganga khadar 4 Ranjeetpur and adjacent river island complex  
 5 Amichand-Nangal complex 6 Dharampur- Jogga jheel complex 7 Sukhapur-Manwala- Chandpuri complex  
 8 Mirapur khadar 9 Shukratal- Haiderpur complex 10 Jeevanpuri and adjacent river islands 11 Buriganga jheel  
 12 Dharmapura- Daranagarganj complex 13 Jahanabad- Joagli jheel complex 14 Hadipur gori  
 15 Rahmanpur- Jahangirpur complex 16 Jalalpur khadar 17 Kalidab khadar 18 Kopla jheel



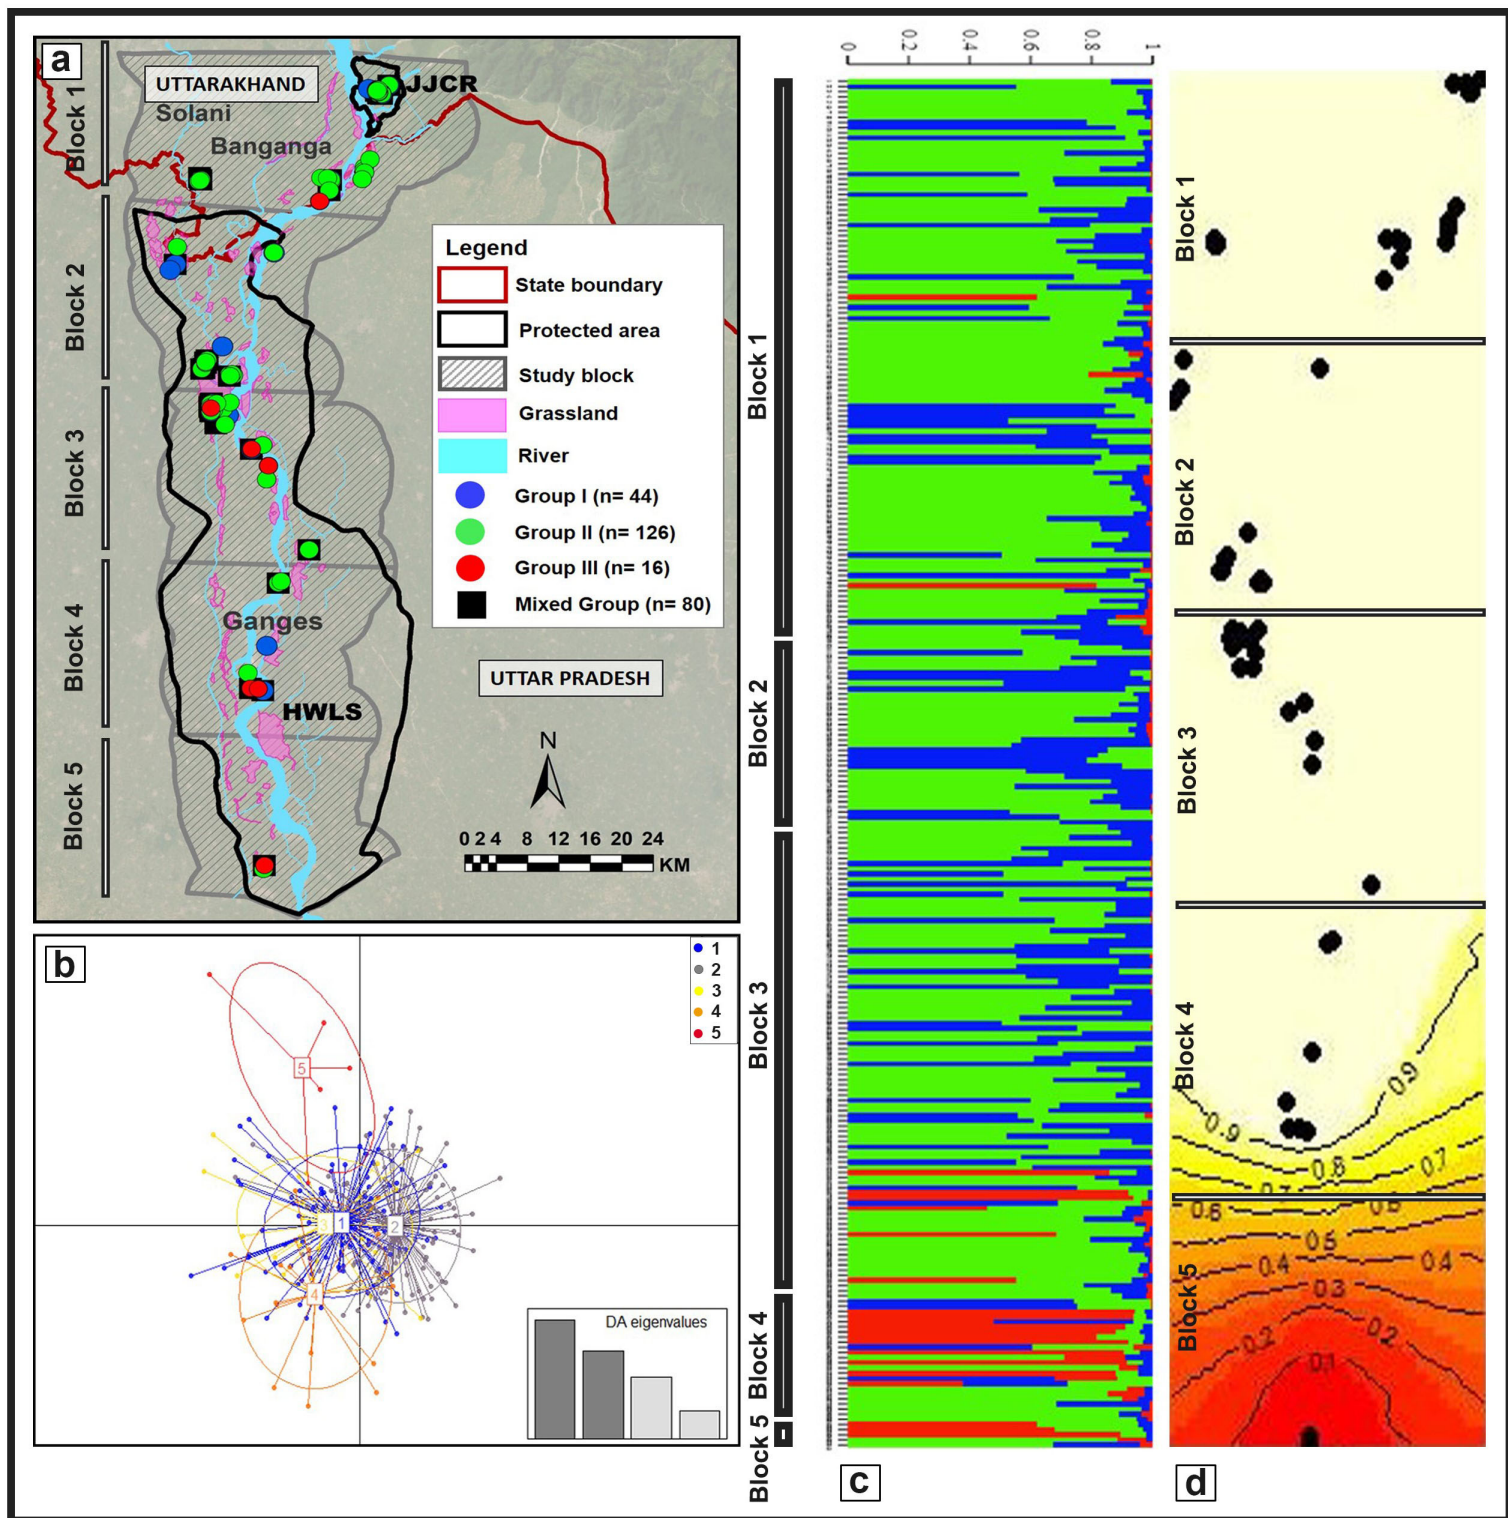

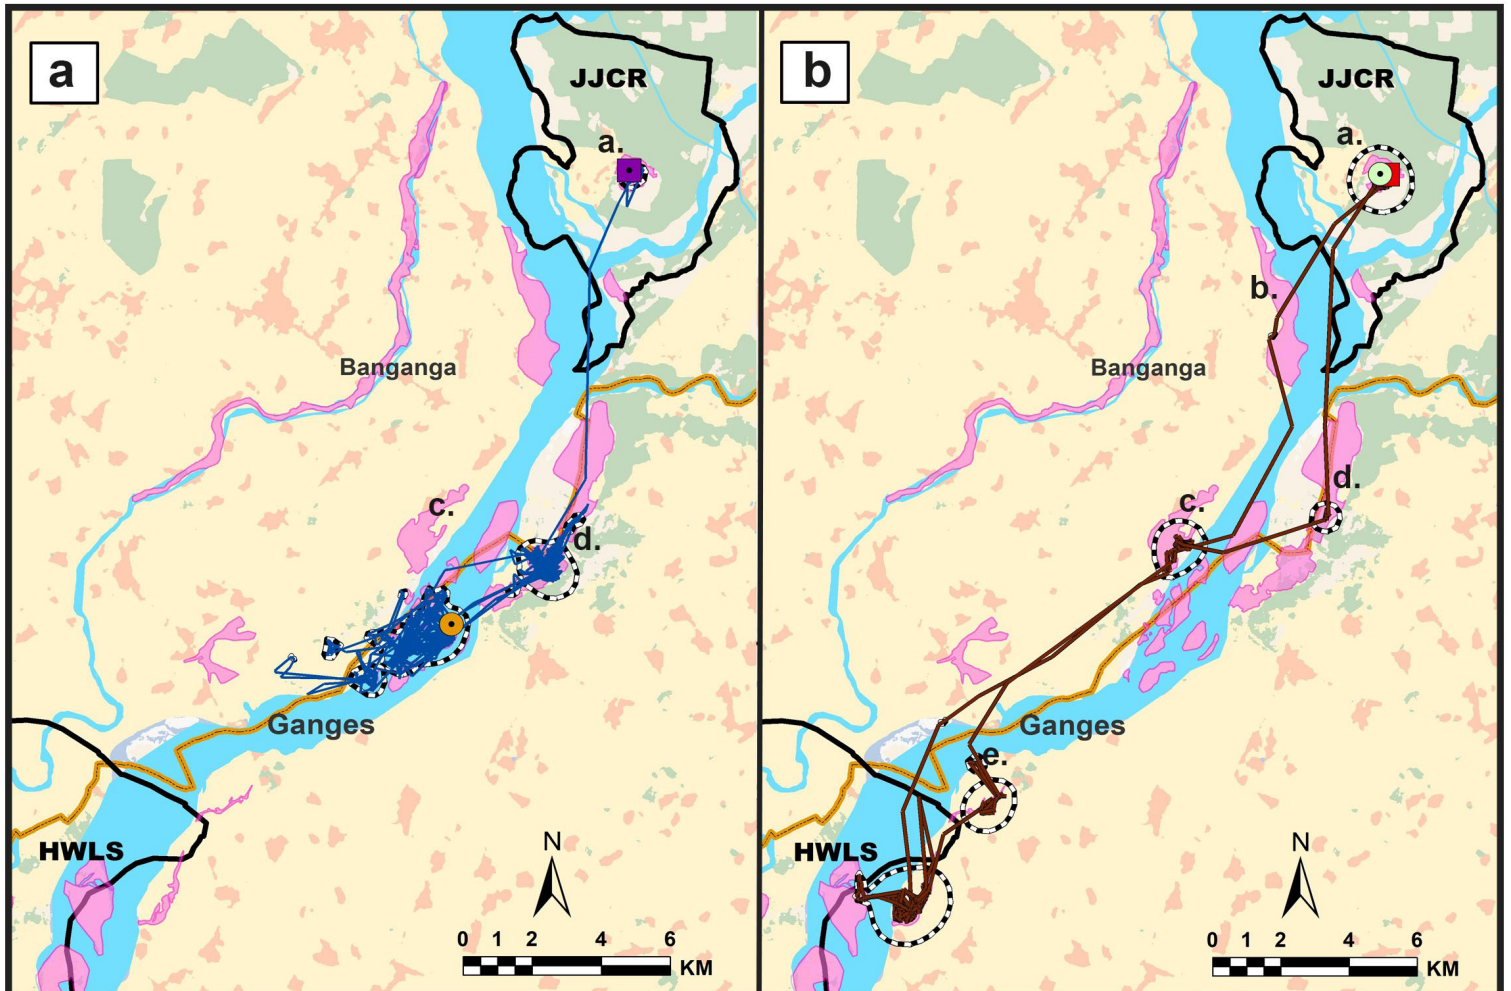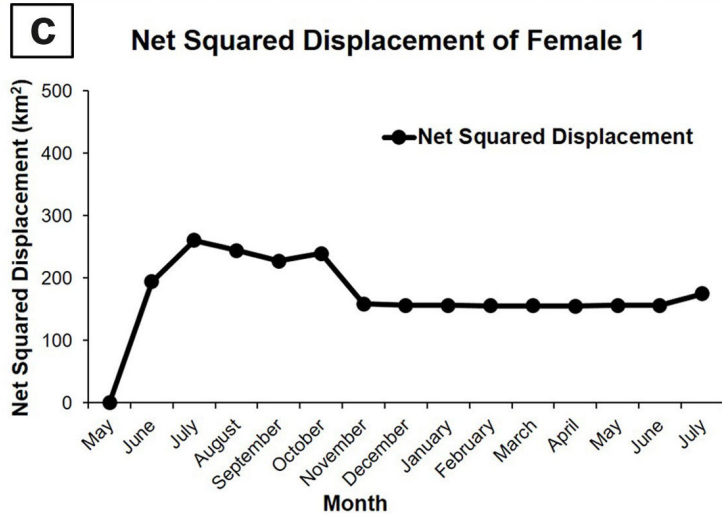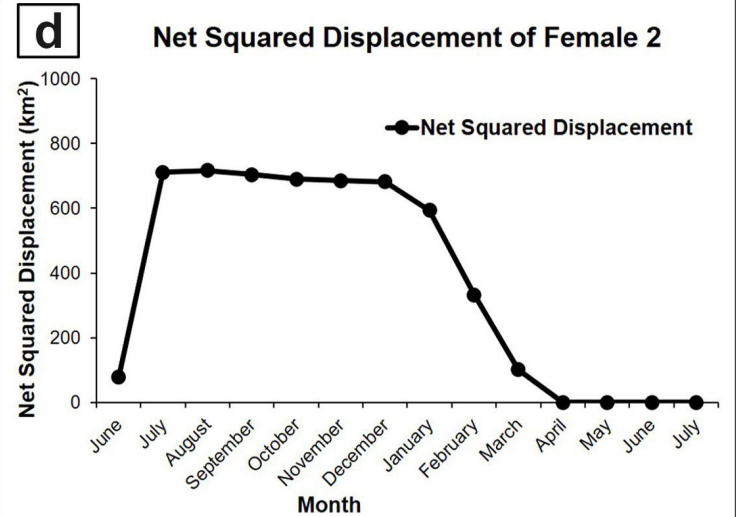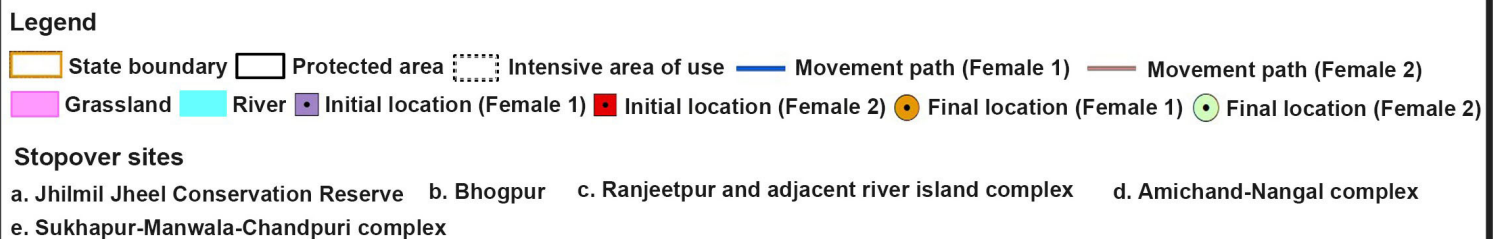

| SL No. | Locus | Species    | Success rate (%) | No of alleles | Allelic Size Range | H <sub>E</sub> | H <sub>O</sub> | Null allele | Allelic Dropout rate | False allele rate | P <sub>ID(sibs)</sub> |
|--------|-------|------------|------------------|---------------|--------------------|----------------|----------------|-------------|----------------------|-------------------|-----------------------|
| 1      | CEH53 | Swamp deer | 86.95            | 13            | 48                 | 0.84           | 0.59           | 0.11        | 0.04                 | 0.10              | 3.43*10 <sup>-1</sup> |
| 2      | CEH33 | Swamp deer | 90.98            | 12            | 24                 | 0.81           | 0.56           | 0.13        | 0.04                 | 0.15              | 1.23*10 <sup>-1</sup> |
| 3      | CEH82 | Swamp deer | 93.71            | 11            | 26                 | 0.81           | 0.66           | 0.07        | 0.06                 | 0.12              | 4.42*10 <sup>-2</sup> |
| 4      | CEH56 | Swamp deer | 91.81            | 7             | 12                 | 0.71           | 0.61           | 0.05        | 0.06                 | 0.14              | 1.90*10 <sup>-2</sup> |
| 5      | CEH35 | Swamp deer | 88.97            | 5             | 8                  | 0.66           | 0.34           | 0.17        | 0.07                 | 0.13              | 8.77*10 <sup>-3</sup> |
| 6      | CEH50 | Swamp deer | 95.14            | 5             | 8                  | 0.62           | 0.54           | 0.04        | 0.06                 | 0.07              | 4.36*10 <sup>-3</sup> |
| 7      | CEH52 | Swamp deer | 84.93            | 8             | 18                 | 0.59           | 0.5            | 0.05        | 0.08                 | 0.06              | 2.23*10 <sup>-3</sup> |
| 8      | CEH58 | Swamp deer | 89.56            | 6             | 22                 | 0.56           | 0.46           | 0.07        | 0.11                 | 0.06              | 1.19*10 <sup>-3</sup> |
| 9      | CEH75 | Swamp deer | 93.12            | 4             | 8                  | 0.53           | 0.59           | 0           | 0.08                 | 0.05              | 6.75*10 <sup>-4</sup> |
| 10     | CEH71 | Swamp deer | 88.61            | 2             | 8                  | 0.46           | 0.61           | 0           | 0.18                 | 0.08              | 4.18*10 <sup>-4</sup> |
| 11     | CEH47 | Swamp deer | 93.71            | 6             | 14                 | 0.43           | 0.35           | 0.07        | 0.17                 | 0.09              | 2.60*10 <sup>-4</sup> |
| 12     | CEH43 | Swamp deer | 95.02            | 4             | 6                  | 0.42           | 0.44           | 0           | 0.12                 | 0.05              | 1.65*10 <sup>-4</sup> |
| 13     | CEH51 | Swamp deer | 93.00            | 3             | 10                 | 0.38           | 0.38           | 0.01        | 0.13                 | 0.06              | 1.10*10 <sup>-4</sup> |
| Mean   |       |            | 91.19            | 6.61          |                    | 0.6            | 0.51           | 0.06        | 0.09                 | 0.09              |                       |
| SD     |       |            | 3.185            | 3.477         |                    | 0.158          | 0.107          | 0.053       | 0.047                | 0.035             |                       |

| <b>Genetic differentiation among five spatial blocks</b> |          |          |          |          |          |
|----------------------------------------------------------|----------|----------|----------|----------|----------|
| <b>Blocks</b>                                            | <b>1</b> | <b>2</b> | <b>3</b> | <b>4</b> | <b>5</b> |
| <b>1</b>                                                 | 0        |          |          |          |          |
| <b>2</b>                                                 | 0.033*   | 0        |          |          |          |
| <b>3</b>                                                 | 0.009*   | 0.024*   | 0        |          |          |
| <b>4</b>                                                 | 0.006*   | 0.039*   | 0.021*   | 0        |          |
| <b>5</b>                                                 | 0.064*   | 0.091*   | 0.089*   | 0.067*   | 0        |

\*Significant at  $P < 0.05$  using 10,000 randomizations

| <b>Movement Parameters</b>                                    | <b>Female 1</b> | <b>Female 2</b> |
|---------------------------------------------------------------|-----------------|-----------------|
| Tracking duration (month)                                     | 14              | 11              |
| Mean step length (km)                                         | 0.117           | 0.082           |
| Mean speed (km/hr)                                            | 0.058           | 0.040           |
| Maximum linear distance travelled from starting location (km) | 18              | 28              |
| Total distance (km)                                           | 584.3           | 309.3           |
| Total displacement (km)                                       | 15.2            | 0.227           |
| Migration type                                                | Mixed migratory | Migratory       |

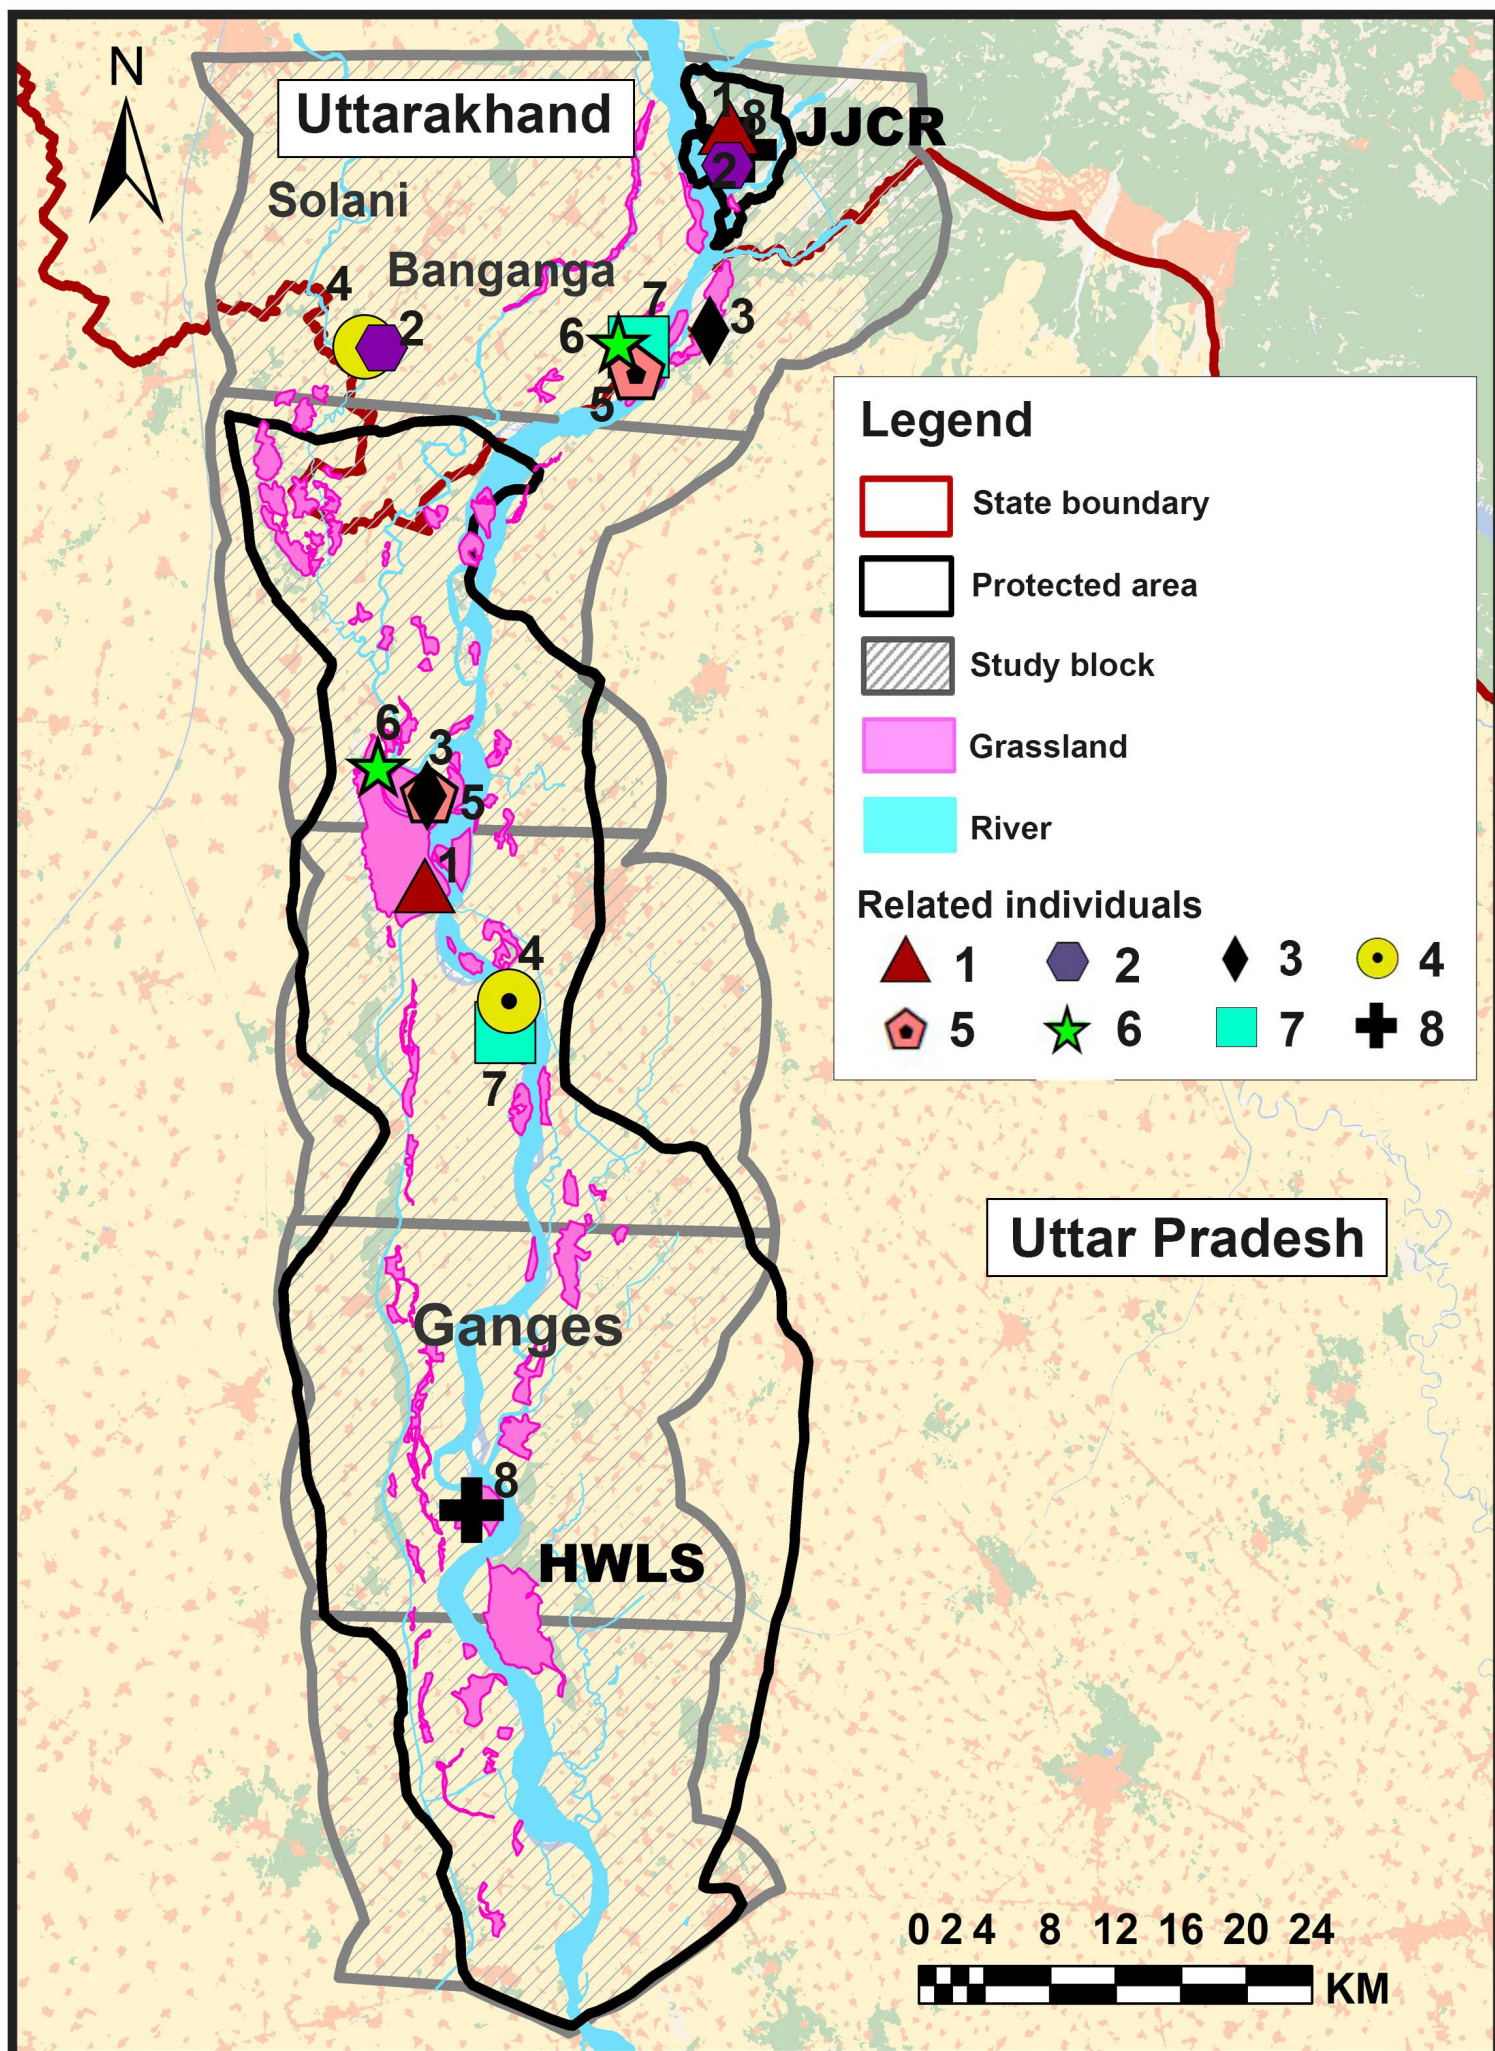

**Supplementary Table 1:** Details (Grasslands, Blocks, Districts, States) of all locations of the antlers and pellets collected in this study.

| Sl No. | Name of the area                          | Block             | District, State                  | No. of antlers | No. of pellets |
|--------|-------------------------------------------|-------------------|----------------------------------|----------------|----------------|
| 1      | Jhilmil Jheel Conservation Reserve (JJCR) | Block 1           | Haridwar, UK                     | 88             | 41             |
| 2      | Bhogpur                                   | Block 1           | Haridwar, UK                     | 0              | 0              |
| 3      | Banganga khadar                           | Block 1           | Haridwar, UK                     | 0              | 0              |
| 4      | Ranjeetpur and adjacent river islands     | Block 1           | Haridwar, UK & Bijnor, UP        | 4              | 17             |
| 5      | Amichand and Nangal                       | Block 1           | Haridwar, UK & Bijnor, UP        | 4              | 15             |
| 6      | Dharampur- Jogga Jheel Complex            | Block 1 & Block 2 | Haridwar, UK & Muzaffarnagar, UP | 15             | 9              |
| 7      | Sukhapur- Manwala- Chandpuri complex      | Block 2           | Bijnor, UP                       | 0              | 21             |
| 8      | Mirapur khadar                            | Block 2           | Bijnor, UP                       | 0              | 0              |
| 9      | Shukratal- Haiderpur complex              | Block 2 & Block 3 | Muzaffarnagar & Bijnor, UP       | 141            | 36             |
| 10     | Jeevanpuri and adjacent river islands     | Block 3           | Bijnor, UP                       | 1              | 13             |
| 11     | Buriganga jheel                           | Block 3           | Meerut, UP                       | 0              | 2              |
| 12     | Dharmapura- Daranagarganj complex         | Block 3           | Muzaffarnagar & Bijnor, UP       | 1              | 16             |
| 13     | Jahanabad- Joagli jheel complex           | Block 3 & Block 4 | Bijnor, UP                       | 0              | 6              |
| 14     | Hadipur Gori                              | Block 4           | Meerut, UP                       | 0              | 9              |
| 15     | Rahmanpur- Jahangirpur complex            | Block 4           | Bijnor, UP                       | 0              | 2              |
| 16     | Jalalpur khadar                           | Block 4           | Meerut, UP                       | 1              | 27             |
| 17     | Kalidab khadar                            | Block 4 & Block 5 | Amroha, UP                       | 0              | 0              |
| 18     | Kopla jheel                               | Block 5           | Hapur, UP                        | 3              | 16             |

\*UK= Uttarakhand; UP= Uttar Pradesh

**Supplementary Table 2:** Details of the initial set of 48 primers tested for swamp deer individual identification.

| SI No. | Marker Name | Selection Status | Reason for Rejection                            |
|--------|-------------|------------------|-------------------------------------------------|
| 1      | CEH 4       | Not selected     | Multiple bands                                  |
| 2      | CEH 22      | Not selected     | Multiple bands                                  |
| 3      | CEH 45      | Not selected     | Multiple bands                                  |
| 4      | CEH 60      | Not selected     | Multiple bands                                  |
| 5      | CEH 73      | Not selected     | Multiple bands                                  |
| 6      | CEH 79      | Not selected     | Multiple bands                                  |
| 7      | CEH 63      | Not selected     | Multiple bands                                  |
| 8      | CEH 15      | Not selected     | Multiple bands                                  |
| 9      | CEH 44      | Not selected     | Multiple bands                                  |
| 10     | CEH 80      | Not selected     | Multiple bands                                  |
| 11     | CEH 81      | Not selected     | Multiple bands                                  |
| 12     | CEH 6       | Not selected     | Multiple bands                                  |
| 13     | CEH 38      | Not selected     | Multiple bands                                  |
| 14     | CEH 78      | Not selected     | Multiple bands                                  |
| 15     | CEH 39      | Not selected     | Multiple bands                                  |
| 16     | CEH 23      | Not selected     | Multiple bands                                  |
| 17     | CEH 57      | Not selected     | No amplification                                |
| 18     | CEH 85      | Not selected     | No amplification                                |
| 19     | CEH 31      | Not selected     | Non-specific bands                              |
| 20     | CEH 55      | Not selected     | Non-specific bands                              |
| 21     | CEH 72      | Not selected     | Non-specific bands                              |
| 22     | CEH 70      | Not selected     | Non-specific bands                              |
| 23     | CEH 28      | Not selected     | Inconsistent amplification                      |
| 24     | CEH 49      | Not selected     | Inconsistent amplification                      |
| 25     | CEH 86      | Not selected     | Inconsistent amplification                      |
| 26     | CEH 34      | Not selected     | Inconsistent amplification                      |
| 27     | CEH 48      | Not selected     | Inconsistent amplification                      |
| 28     | CEH 68      | Not selected     | Excessive stutter bands and low RFUs            |
| 29     | CEH 74      | Not selected     | Excessive stutter bands and low RFUs            |
| 30     | CEH 87      | Not selected     | Unstable allele characteristics                 |
| 31     | CEH 77      | Not selected     | Unstable allele characteristics                 |
| 32     | CEH 84      | Not selected     | Unstable allele characteristics                 |
| 33     | CEH 61      | Not selected     | Inconsistent results with antler and pellet DNA |
| 34     | CEH 64      | Not selected     | Inconsistent results with antler and pellet DNA |
| 35     | CEH 76      | Not selected     | Inconsistent results with antler and pellet DNA |
| 36     | CEH 53      | Selected         | -                                               |
| 37     | CEH 58      | Selected         | -                                               |
| 38     | CEH 71      | Selected         | -                                               |
| 39     | CEH 35      | Selected         | -                                               |
| 40     | CEH 33      | Selected         | -                                               |
| 41     | CEH 43      | Selected         | -                                               |
| 42     | CEH 52      | Selected         | -                                               |
| 43     | CEH 50      | Selected         | -                                               |
| 44     | CEH 82      | Selected         | -                                               |
| 45     | CEH 56      | Selected         | -                                               |
| 46     | CEH 51      | Selected         | -                                               |
| 47     | CEH 47      | Selected         | -                                               |
| 48     | CEH 75      | Selected         | -                                               |
